# Supplementary material
Source: PubMed Central journal article supplement (PMC2890244)
Supplement: ja101362u_si_001.pdf [file ja101362u_si_001.pdf]

# Comparison of Entropic Contributions to Binding in a ‘Hydrophilic’ versus ‘Hydrophobic’ Ligand-Protein Interaction

Neil R. Syme, Caitriona Dennis, Agnieszka Bronowska, Guido Paesen and Steve W. Homans \*

## Supplementary Information

20. Case, D. A.; Darden, T. A.; Cheatham III, T. E.; Simmerling, C. L.; Wang, J.; Duke, R. E.; Luo, R.; Merz, K. M.; Wang, B.; Pearlman, D. A.; Crowley, M.; Brozell, S.; Tsui, V.; Gohlke, H.; Mongan, J.; Hornak, V.; Cui, G.; Beroza, P.; Schafmeister, C.; Caldwell, J. W.; Ross, W. S.; Kollman, P. A. AMBER 8, University of California, San Francisco.

24. Frisch, M. J.; Trucks, G. W.; Schegel, H. B.; Gill, P. M. W.; Johnson, B. G.; Robb, J. A.; Cheeseman, J. R.; Keith, T. A.; Petersson, G. A.; Montgomery, J. A.; Raghavachari, K.; Al-Laham, M. A.; Zakrzewski, V. G.; Ortiz, J. V.; Foresman, J. B.; Cioslowski, J.; Stefanov, B. B.; Nanayakkara, A.; Challacombe, M.; Peng, C. Y.; Ayala, P. Y.; Chen, W.; Wong, M. W.; Andres, J. L.; Replogle, E. S.; Gomperts, R.; Martin, R. L.; Fox, D. J.; Binkley, J. S.; Defrees, D. J.; Baker, J.; Stewart, J. P.; Head-Gordon, M.; Gonzalez, C.; Pople, J. A. *Gaussian 98 (Revision A.9)*, Gaussian, Inc.: Pittsburgh, PA, 1998.

**Table s1.** Amide  $^{15}\text{N}$  and  $^1\text{H}$  chemical shifts for *apo* and histamine-bound rRaHBP-2(D24R), determined at pH 7.4 and at a temperature of 298 K.

| Residue | Apo                   |                    | complex               |                    |
|---------|-----------------------|--------------------|-----------------------|--------------------|
|         | $^{15}\text{N}$ (ppm) | $^1\text{H}$ (ppm) | $^{15}\text{N}$ (ppm) | $^1\text{H}$ (ppm) |
| Asn 1   |                       |                    |                       |                    |
| Gln 2   |                       |                    |                       |                    |
| Pro 3   |                       |                    |                       |                    |
| Asp 4   | 121.51                | 8.49               | 121.48                | 8.48               |
| Trp 5   | 110.71                | 6.14               | 110.75                | 6.13               |
| Ala 6   | 130.86                | 7.28               | 130.94                | 7.28               |
| Asp 7   | 124.66                | 7.75               | 124.60                | 7.74               |
| Glu 8   | 128.70                | 8.95               | 128.69                | 8.95               |
| Ala 9   | 122.01                | 8.24               | 121.98                | 8.21               |
| Ala 10  | 117.85                | 7.59               | 117.67                | 7.58               |
| Asn 11  | 112.25                | 8.51               | 112.24                | 8.50               |
| Gly 12  | 111.24                | 8.67               | 111.21                | 8.65               |
| Ala 13  | 122.55                | 8.43               | 122.51                | 8.42               |
| His 14  | 114.15                | 8.07               | 114.12                | 8.05               |
| Gln 15  | 119.56                | 7.59               |                       |                    |
| Asp 16  | 121.91                | 8.31               | 121.05                | 8.28               |
| Ala 17  | 127.56                | 8.34               | 127.48                | 8.32               |
| Trp 18  |                       |                    | 119.09                | 9.16               |
| Lys 19  | 118.97                | 7.34               | 119.01                | 7.34               |
| Ser 20  | 114.06                | 7.30               | 113.87                | 7.26               |
| Leu 21  | 122.76                | 8.31               | 122.88                | 8.30               |
| Lys 22  | 115.91                | 7.55               | 116.20                | 7.58               |
| Ala 23  | 122.98                | 7.60               | 123.02                | 7.57               |
| Arg 24  | 115.68                | 6.92               | 115.71                | 6.93               |
| Val 25  | 119.63                | 7.52               |                       |                    |
| Glu 26  | 116.61                | 7.04               | 116.54                | 7.05               |
| Asn 27  | 115.46                | 7.71               | 115.39                | 7.70               |
| Val 28  | 119.19                | 7.86               | 118.95                | 7.82               |
| Tyr 29  | 124.92                | 8.30               | 125.18                | 8.53               |
| Tyr 30  | 119.48                | 9.05               | 120.37                | 9.02               |
| Met 31  | 125.76                | 8.71               | 125.26                | 8.70               |
| Val 32  | 121.29                | 8.57               | 121.43                | 8.59               |
| Lys 33  | 117.64                | 7.46               | 117.72                | 7.43               |
| Ala 34  | 118.17                | 8.54               | 118.31                | 8.52               |
| Thr 35  | 105.10                | 8.36               | 105.12                | 8.40               |
| Tyr 36  | 116.65                | 7.15               |                       |                    |
| Lys 37  | 120.08                | 8.89               | 120.60                | 8.93               |
| Asn 38  | 116.24                | 8.23               | 115.57                | 8.33               |
| Asp 39  | 123.00                | 8.77               | 122.66                | 8.84               |
| Pro 40  |                       |                    |                       |                    |
| Val 41  |                       |                    | 116.80                | 7.89               |
| Trp 42  |                       |                    | 120.73                | 8.75               |
| Gly 43  |                       |                    | 103.31                | 7.89               |
| Asn 44  | 118.41                | 8.89               | 118.06                | 8.83               |
| Asp 45  | 123.31                | 8.74               | 122.88                | 8.63               |
| Phe 46  | 113.46                | 7.00               | 113.36                | 6.98               |
| Thr 47  | 111.54                | 9.17               | 111.13                | 9.11               |
| Cys 48  |                       |                    | 108.02                | 7.74               |
| Val 49  | 115.12                | 6.09               | 115.02                | 6.05               |
| Gly 50  | 115.66                | 9.13               | 115.75                | 8.91               |
| Val 51  | 118.43                | 9.21               | 118.77                | 9.22               |
| Met 52  | 123.13                | 8.13               | 123.58                | 8.23               |
| Ala 53  | 124.38                | 8.03               | 124.64                | 8.09               |
| Asn 54  | 116.86                | 8.90               | 116.99                | 8.96               |
| Asp 55  |                       |                    | 117.14                | 8.17               |

|                |        |       |        |       |
|----------------|--------|-------|--------|-------|
| <b>Val 56</b>  | 119.26 | 8.26  |        |       |
| <b>Asn 57</b>  | 127.05 | 9.21  | 126.80 | 9.22  |
| <b>Glu 58</b>  | 124.41 | 9.13  | 124.43 | 9.12  |
| <b>Asp 59</b>  | 118.31 | 8.10  | 118.27 | 8.10  |
| <b>Glu 60</b>  | 116.34 | 7.26  | 116.41 | 7.24  |
| <b>Lys 61</b>  | 115.53 | 7.39  | 115.49 | 7.36  |
| <b>Ser 62</b>  | 110.71 | 7.83  | 110.61 | 7.82  |
| <b>Ile 63</b>  | 111.64 | 9.03  | 111.70 | 9.11  |
| <b>Gln 64</b>  | 119.68 | 8.13  | 119.62 | 8.02  |
| <b>Ala 65</b>  | 129.03 | 9.26  | 129.23 | 9.34  |
| <b>Glu 66</b>  | 122.24 | 8.65  | 122.51 | 8.79  |
| <b>Phe 67</b>  | 123.98 | 9.71  | 123.51 | 9.78  |
| <b>Leu 68</b>  | 122.18 | 8.80  | 121.56 | 8.70  |
| <b>Phe 69</b>  | 113.33 | 8.01  | 112.55 | 7.94  |
| <b>Met 70</b>  | 116.37 | 8.49  | 116.63 | 8.47  |
| <b>Asn 71</b>  | 115.50 | 8.63  | 115.68 | 8.58  |
| <b>Asn 72</b>  | 111.27 | 7.93  | 111.76 | 7.93  |
| <b>Ala 73</b>  | 122.48 | 8.84  | 122.74 | 8.80  |
| <b>Asp 74</b>  | 116.75 | 7.72  | 117.37 | 7.73  |
| <b>Thr 75</b>  | 114.68 | 8.43  | 114.73 | 8.38  |
| <b>Asn 76</b>  | 119.66 | 8.22  |        |       |
| <b>Met 77</b>  | 121.66 | 8.56  | 121.93 | 8.54  |
| <b>Gln 78</b>  | 125.88 | 8.80  | 125.63 | 8.72  |
| <b>Phe 79</b>  | 114.60 | 7.81  | 114.63 | 7.78  |
| <b>Ala 80</b>  | 123.62 | 8.99  | 123.63 | 8.73  |
| <b>Thr 81</b>  | 117.49 | 8.89  | 116.97 | 8.88  |
| <b>Glu 82</b>  | 123.18 | 9.28  | 125.35 | 9.41  |
| <b>Lys 83</b>  | 124.25 | 8.29  | 124.01 | 8.20  |
| <b>Val 84</b>  | 126.91 | 8.82  | 125.81 | 8.84  |
| <b>Thr 85</b>  | 122.05 | 8.77  | 122.34 | 8.67  |
| <b>Ala 86</b>  | 129.58 | 9.03  | 129.69 | 8.97  |
| <b>Val 87</b>  | 115.53 | 8.65  |        |       |
| <b>Lys 88</b>  | 118.87 | 8.44  | 118.79 | 8.43  |
| <b>Met 89</b>  | 124.65 | 9.86  | 124.65 | 9.87  |
| <b>Tyr 90</b>  | 115.12 | 8.95  | 115.07 | 8.97  |
| <b>Gly 91</b>  | 105.22 | 8.89  | 105.12 | 8.89  |
| <b>Tyr 92</b>  | 123.46 | 7.46  | 123.46 | 7.44  |
| <b>Asn 93</b>  | 120.01 | 11.17 | 120.08 | 11.18 |
| <b>Arg 94</b>  | 122.22 | 8.59  | 122.30 | 8.63  |
| <b>Glu 95</b>  | 124.51 | 10.04 | 124.47 | 10.03 |
| <b>Asn 96</b>  | 123.18 | 9.38  | 123.27 | 9.37  |
| <b>Ala 97</b>  | 125.27 | 8.63  | 125.11 | 8.66  |
| <b>Phe 98</b>  | 119.23 | 9.16  | 119.90 | 9.27  |
| <b>Arg 99</b>  | 123.45 | 9.50  | 122.93 | 9.46  |
| <b>Tyr 100</b> |        |       | 130.81 | 10.39 |
| <b>Glu 101</b> | 120.24 | 9.09  | 120.77 | 9.54  |
| <b>Thr 102</b> | 115.63 | 8.88  | 116.57 | 8.90  |
| <b>Glu 103</b> | 122.17 | 9.71  | 122.60 | 9.91  |
| <b>Asp 104</b> | 114.26 | 8.13  | 114.09 | 8.21  |
| <b>Gly 105</b> | 107.67 | 7.86  | 107.51 | 7.71  |
| <b>Gln 106</b> | 119.98 | 7.70  | 120.21 | 7.83  |
| <b>Val 107</b> | 121.12 | 7.62  | 121.81 | 7.52  |
| <b>Phe 108</b> | 125.96 | 8.65  | 124.32 | 8.63  |
| <b>Thr 109</b> |        |       | 121.06 | 8.92  |
| <b>Asp 110</b> |        |       | 127.71 | 8.87  |
| <b>Val 111</b> | 119.56 | 9.58  | 119.70 | 9.59  |
| <b>Ile 112</b> | 125.96 | 9.05  | 126.07 | 9.12  |
| <b>Ala 113</b> | 132.17 | 8.59  | 132.49 | 8.59  |
| <b>Tyr 114</b> | 118.39 | 8.04  | 118.50 | 8.04  |
| <b>Ser 115</b> | 124.84 | 8.46  | 124.81 | 8.45  |

|                |        |       |        |       |
|----------------|--------|-------|--------|-------|
| <b>Asp 116</b> | 127.56 | 8.98  | 127.54 | 8.99  |
| <b>Asp 117</b> | 119.70 | 8.96  | 119.59 | 8.93  |
| <b>Asn 118</b> | 112.11 | 8.37  | 111.91 | 8.33  |
| <b>Cys 119</b> | 116.08 | 8.02  | 116.11 | 8.01  |
| <b>Asp 120</b> | 118.89 | 9.59  | 119.14 | 9.69  |
| <b>Val 121</b> | 123.05 | 10.06 | 123.36 | 10.06 |
| <b>Ile 122</b> | 129.71 | 9.57  | 129.49 | 9.60  |
| <b>Tyr 123</b> | 128.59 | 10.07 | 128.78 | 10.13 |
| <b>Val 124</b> | 131.21 | 8.78  | 131.07 | 8.81  |
| <b>Pro 125</b> |        |       |        |       |
| <b>Gly 126</b> | 105.40 | 7.75  | 103.92 | 7.67  |
| <b>Thr 127</b> | 111.12 | 7.95  | 109.55 | 8.34  |
| <b>Asp 128</b> |        |       | 124.38 | 7.90  |
| <b>Gly 129</b> | 107.22 | 8.25  | 107.39 | 8.09  |
| <b>Asn 130</b> |        |       | 117.75 | 8.26  |
| <b>Glu 131</b> | 119.71 | 8.20  |        |       |
| <b>Glu 132</b> |        |       | 124.15 | 8.28  |
| <b>Gly 133</b> | 111.86 | 8.73  | 112.64 | 8.76  |
| <b>Tyr 134</b> | 114.89 | 8.98  | 115.12 | 9.08  |
| <b>Glu 135</b> | 117.75 | 10.00 | 117.81 | 10.04 |
| <b>Leu 136</b> | 124.15 | 8.48  | 124.27 | 8.51  |
| <b>Trp 137</b> | 127.42 | 9.93  | 127.55 | 9.97  |
| <b>Thr 138</b> | 114.00 | 9.76  | 114.44 | 9.80  |
| <b>Thr 139</b> | 113.70 | 7.38  | 113.83 | 7.35  |
| <b>Asp 140</b> | 122.73 | 7.84  | 122.93 | 7.83  |
| <b>Tyr 141</b> | 118.48 | 6.43  | 118.27 | 6.43  |
| <b>Asp 142</b> | 121.35 | 7.74  | 121.38 | 7.73  |
| <b>Asn 143</b> | 120.08 | 7.23  | 120.11 | 7.23  |
| <b>Ile 144</b> | 124.89 | 8.56  | 124.87 | 8.53  |
| <b>Pro 145</b> |        |       |        |       |
| <b>Ala 146</b> | 128.34 | 8.72  | 128.39 | 8.71  |
| <b>Asn 147</b> |        |       |        |       |
| <b>Cys 148</b> | 114.41 | 7.46  | 114.48 | 7.45  |
| <b>Leu 149</b> | 121.69 | 7.98  | 121.67 | 7.99  |
| <b>Asn 150</b> | 115.85 | 8.66  | 115.91 | 8.65  |
| <b>Lys 151</b> | 119.46 | 7.18  | 119.47 | 7.18  |
| <b>Phe 152</b> | 118.92 | 8.31  | 118.95 | 8.31  |
| <b>Asn 153</b> | 115.49 | 8.47  | 115.51 | 8.47  |
| <b>Glu 154</b> | 120.43 | 7.73  | 120.46 | 7.73  |
| <b>Tyr 155</b> | 118.22 | 8.01  | 118.08 | 7.99  |
| <b>Ala 156</b> | 120.08 | 8.13  | 120.09 | 8.14  |
| <b>Val 157</b> | 118.58 | 6.48  | 118.55 | 6.47  |
| <b>Gly 158</b> |        |       |        |       |
| <b>Arg 159</b> | 118.91 | 7.84  |        |       |
| <b>Glu 160</b> | 123.39 | 8.92  | 123.43 | 8.92  |
| <b>Thr 161</b> |        |       | 117.05 | 8.26  |
| <b>Arg 162</b> | 122.26 | 8.88  | 122.53 | 8.89  |
| <b>Asp 163</b> | 121.23 | 8.44  | 121.05 | 8.43  |
| <b>Val 164</b> | 122.73 | 7.66  | 122.78 | 7.63  |
| <b>Phe 165</b> | 126.46 | 9.16  | 126.10 | 9.10  |
| <b>Thr 166</b> | 117.62 | 6.61  | 117.57 | 6.58  |
| <b>Ser 167</b> | 115.48 | 9.18  | 115.42 | 9.16  |
| <b>Ala 168</b> | 124.30 | 7.51  | 124.28 | 7.49  |
| <b>Cys 169</b> | 114.30 | 7.63  | 114.23 | 7.61  |
| <b>Leu 170</b> | 118.06 | 7.21  | 117.84 | 7.19  |
| <b>Glu 171</b> | 125.50 | 7.35  | 125.50 | 7.34  |

**Table s2.**  $^{15}\text{N}$  amide  $R_1$  and  $R_2$  and ssNOE values for *apo* rRaHBP-2(D24R) at 500 MHz, 298 K.

The error in the average values is given as the standard deviation.

| <b>Residue</b> | <b><math>R_1</math> (1/s)</b> | <b>error</b> | <b><math>R_2</math> (1/s)</b> | <b>error</b> | <b>ssNOE</b> | <b>error</b> |
|----------------|-------------------------------|--------------|-------------------------------|--------------|--------------|--------------|
| <b>D4</b>      | 1.64                          | 0.08         | 11.41                         | 0.44         | 0.87         | 0.08         |
| <b>W5</b>      | 1.56                          | 0.04         | 10.29                         | 0.16         | 0.78         | 0.04         |
| <b>A6</b>      | 1.72                          | 0.03         | 10.61                         | 0.24         | 0.82         | 0.04         |
| <b>D7</b>      | 1.30                          | 0.03         | 8.56                          | 0.12         | 0.63         | 0.04         |
| <b>E8</b>      | 1.73                          | 0.07         | 10.27                         | 0.12         | 0.80         | 0.04         |
| <b>A9</b>      | 1.79                          | 0.02         | 10.54                         | 0.17         | 0.73         | 0.03         |
| <b>A10</b>     | 1.62                          | 0.03         | 10.34                         | 0.15         | 0.76         | 0.04         |
| <b>N11</b>     | 1.60                          | 0.05         | 10.34                         | 0.22         | 0.76         | 0.05         |
| <b>G12</b>     | 1.71                          | 0.05         | 11.48                         | 0.17         | 0.76         | 0.05         |
| <b>A13</b>     | 1.89                          | 0.10         | 11.67                         | 0.49         | 0.83         | 0.07         |
| <b>H14</b>     |                               |              |                               |              |              |              |
| <b>Q15</b>     | 1.62                          | 0.04         | 11.51                         | 0.17         | 0.77         | 0.05         |
| <b>D16</b>     | 1.67                          | 0.04         | 10.19                         | 0.19         | 0.77         | 0.04         |
| <b>A17</b>     | 1.66                          | 0.03         | 11.05                         | 0.22         | 0.80         | 0.05         |
| <b>K19</b>     | 1.65                          | 0.03         | 11.38                         | 0.10         | 0.77         | 0.05         |
| <b>S20</b>     | 1.68                          | 0.04         | 11.26                         | 0.20         | 0.79         | 0.06         |
| <b>L21</b>     | 1.75                          | 0.04         | 11.81                         | 0.39         | 0.74         | 0.06         |
| <b>K22</b>     | 1.66                          | 0.03         | 11.67                         | 0.17         | 0.83         | 0.04         |
| <b>A23</b>     | 1.76                          | 0.03         | 11.16                         | 0.17         | 0.78         | 0.06         |
| <b>R24</b>     | 1.66                          | 0.03         | 11.45                         | 0.27         | 0.68         | 0.05         |
| <b>V25</b>     | 1.69                          | 0.03         | 12.25                         | 0.23         | 0.81         | 0.06         |
| <b>E26</b>     | 1.54                          | 0.03         | 9.75                          | 0.16         | 0.69         | 0.05         |
| <b>N27</b>     | 1.56                          | 0.02         | 9.74                          | 0.16         | 0.73         | 0.05         |
| <b>V28</b>     | 1.54                          | 0.02         | 9.16                          | 0.08         | 0.68         | 0.04         |
| <b>Y29</b>     | 1.70                          | 0.05         | 10.31                         | 0.35         | 0.81         | 0.07         |
| <b>Y30</b>     | 1.73                          | 0.05         | 11.07                         | 0.30         | 0.75         | 0.07         |
| <b>M31</b>     | 1.73                          | 0.05         | 11.06                         | 0.32         | 0.78         | 0.06         |
| <b>V32</b>     | 1.72                          | 0.08         | 14.15                         | 0.68         | 0.68         | 0.10         |
| <b>K33</b>     | 1.71                          | 0.06         | 11.48                         | 0.19         | 0.77         | 0.07         |
| <b>A34</b>     | 1.72                          | 0.03         | 10.88                         | 0.27         | 0.79         | 0.05         |
| <b>T35</b>     | 1.69                          | 0.09         | 11.07                         | 0.46         | 0.81         | 0.10         |
| <b>Y36</b>     | 1.83                          | 0.06         | 12.34                         | 0.44         | 0.87         | 0.10         |
| <b>K37</b>     | 1.84                          | 0.10         | 12.00                         | 0.38         | 0.75         | 0.12         |
| <b>N38</b>     | 1.40                          | 0.17         | 10.98                         | 1.40         | 0.28         | 0.18         |
| <b>D39</b>     | 1.74                          | 0.06         | 12.75                         | 0.46         | 0.70         | 0.07         |
| <b>N44</b>     | 1.71                          | 0.06         | 11.51                         | 0.50         | 0.78         | 0.08         |
| <b>D45</b>     | 1.76                          | 0.04         | 10.51                         | 0.24         | 0.76         | 0.07         |
| <b>F46</b>     | 1.61                          | 0.02         | 10.42                         | 0.16         | 0.83         | 0.05         |
| <b>T47</b>     | 1.68                          | 0.04         | 11.21                         | 0.46         | 0.78         | 0.07         |
| <b>V49</b>     | 1.58                          | 0.05         | 10.43                         | 0.30         | 0.75         | 0.06         |
| <b>G50</b>     | 1.88                          | 0.12         | 10.22                         | 0.76         | 0.65         | 0.13         |
| <b>V51</b>     | 1.78                          | 0.04         | 12.15                         | 0.42         | 0.72         | 0.06         |
| <b>M52</b>     | 1.77                          | 0.03         | 11.49                         | 0.20         | 0.73         | 0.06         |
| <b>A53</b>     | 1.78                          | 0.16         | 12.40                         | 0.54         | 0.61         | 0.14         |
| <b>N54</b>     | 1.69                          | 0.03         | 9.54                          | 0.17         | 0.65         | 0.05         |
| <b>V56</b>     | 1.65                          | 0.03         | 9.61                          | 0.15         | 0.74         | 0.04         |
| <b>N57</b>     | 1.72                          | 0.05         | 10.41                         | 0.28         | 0.77         | 0.07         |
| <b>E58</b>     | 1.83                          | 0.09         | 10.97                         | 0.41         | 0.76         | 0.05         |
| <b>D59</b>     | 1.63                          | 0.02         | 10.19                         | 0.14         | 0.79         | 0.03         |
| <b>E60</b>     | 1.57                          | 0.02         | 9.99                          | 0.08         | 0.77         | 0.05         |
| <b>K61</b>     | 1.71                          | 0.03         | 10.33                         | 0.26         | 0.70         | 0.05         |
| <b>S62</b>     | 1.71                          | 0.04         | 10.89                         | 0.15         | 0.79         | 0.05         |
| <b>I63</b>     | 1.73                          | 0.04         | 10.31                         | 0.18         | 0.64         | 0.07         |
| <b>Q64</b>     |                               |              |                               |              |              |              |
| <b>A65</b>     | 1.69                          | 0.05         | 9.98                          | 0.23         | 0.74         | 0.05         |
| <b>E66</b>     | 1.76                          | 0.02         | 10.07                         | 0.22         | 0.71         | 0.07         |

|             |      |      |       |      |      |      |
|-------------|------|------|-------|------|------|------|
| <b>F67</b>  | 1.68 | 0.06 | 11.40 | 0.46 | 0.67 | 0.12 |
| <b>L68</b>  | 1.79 | 0.05 | 10.87 | 0.14 | 0.63 | 0.08 |
| <b>F69</b>  |      |      |       |      |      |      |
| <b>M70</b>  | 1.63 | 0.06 | 11.12 | 0.12 | 0.74 | 0.07 |
| <b>N71</b>  |      |      |       |      |      |      |
| <b>N72</b>  | 1.66 | 0.05 | 10.76 | 0.57 | 0.57 | 0.06 |
| <b>A73</b>  | 1.66 | 0.02 | 10.86 | 0.14 | 0.79 | 0.04 |
| <b>D74</b>  | 1.63 | 0.03 | 10.02 | 0.10 | 0.69 | 0.04 |
| <b>T75</b>  | 1.75 | 0.10 | 10.08 | 0.31 | 0.70 | 0.08 |
| <b>N76</b>  |      |      |       |      |      |      |
| <b>M77</b>  | 1.62 | 0.03 | 10.16 | 0.17 | 0.69 | 0.04 |
| <b>Q78</b>  | 1.65 | 0.07 | 11.11 | 0.36 | 0.84 | 0.08 |
| <b>F79</b>  |      |      |       |      |      |      |
| <b>A80</b>  | 1.65 | 0.07 | 10.34 | 0.27 | 0.69 | 0.07 |
| <b>T81</b>  | 1.67 | 0.03 | 10.67 | 0.28 | 0.73 | 0.07 |
| <b>E82</b>  | 1.78 | 0.05 | 10.48 | 0.41 | 0.78 | 0.10 |
| <b>K83</b>  | 1.45 | 0.13 | 10.94 | 0.67 | 0.53 | 0.13 |
| <b>V84</b>  | 1.74 | 0.08 | 13.69 | 0.61 | 0.72 | 0.14 |
| <b>T85</b>  | 1.84 | 0.03 | 11.49 | 0.39 | 0.89 | 0.11 |
| <b>A86</b>  | 1.80 | 0.03 | 10.54 | 0.18 | 0.73 | 0.05 |
| <b>V87</b>  |      |      |       |      |      |      |
| <b>K88</b>  | 1.76 | 0.03 | 10.24 | 0.16 | 0.71 | 0.06 |
| <b>M89</b>  | 1.61 | 0.02 | 10.19 | 0.19 | 0.82 | 0.06 |
| <b>Y90</b>  |      |      |       |      |      |      |
| <b>G91</b>  | 1.97 | 0.07 | 11.87 | 0.27 | 0.76 | 0.06 |
| <b>Y92</b>  | 1.73 | 0.05 | 11.70 | 0.30 | 0.74 | 0.05 |
| <b>N93</b>  | 1.55 | 0.04 | 10.15 | 0.34 | 0.83 | 0.07 |
| <b>R94</b>  | 1.64 | 0.03 | 10.21 | 0.15 | 0.75 | 0.05 |
| <b>E95</b>  | 1.65 | 0.03 | 10.33 | 0.28 | 0.80 | 0.04 |
| <b>N96</b>  | 1.71 | 0.05 | 10.90 | 0.10 | 0.80 | 0.07 |
| <b>A97</b>  |      |      |       |      |      |      |
| <b>F98</b>  |      |      |       |      |      |      |
| <b>R99</b>  | 1.72 | 0.02 | 10.73 | 0.23 | 0.72 | 0.06 |
| <b>E101</b> | 1.79 | 0.05 | 11.80 | 0.44 | 0.79 | 0.09 |
| <b>T102</b> | 1.72 | 0.05 | 11.60 | 0.21 | 0.75 | 0.06 |
| <b>E103</b> | 2.03 | 0.12 | 10.56 | 0.30 | 0.70 | 0.11 |
| <b>D104</b> |      |      |       |      |      |      |
| <b>G105</b> | 1.68 | 0.10 | 9.64  | 0.27 | 0.68 | 0.08 |
| <b>Q106</b> | 1.60 | 0.05 | 9.90  | 0.21 | 0.59 | 0.07 |
| <b>V107</b> | 1.67 | 0.03 | 9.57  | 0.13 | 0.71 | 0.05 |
| <b>F108</b> |      |      |       |      |      |      |
| <b>V111</b> | 1.69 | 0.06 | 16.74 | 0.58 | 0.87 | 0.08 |
| <b>I112</b> | 1.69 | 0.04 | 11.34 | 0.27 | 0.77 | 0.06 |
| <b>A113</b> | 1.60 | 0.03 | 11.92 | 0.27 | 0.76 | 0.06 |
| <b>Y114</b> |      |      |       |      |      |      |
| <b>S115</b> | 1.61 | 0.03 | 10.68 | 0.16 | 0.78 | 0.05 |
| <b>D116</b> | 1.69 | 0.05 | 10.79 | 0.13 | 0.79 | 0.06 |
| <b>D117</b> | 1.89 | 0.11 | 12.98 | 0.47 | 0.70 | 0.07 |
| <b>N118</b> | 1.70 | 0.06 | 10.43 | 0.26 | 0.65 | 0.06 |
| <b>C119</b> | 1.74 | 0.04 | 17.75 | 0.98 | 0.82 | 0.07 |
| <b>D120</b> | 1.59 | 0.24 | 19.56 | 1.55 | 0.53 | 0.19 |
| <b>V121</b> | 1.60 | 0.03 | 11.71 | 0.28 | 0.70 | 0.06 |
| <b>I122</b> | 1.60 | 0.04 | 11.87 | 0.35 | 0.76 | 0.06 |
| <b>Y123</b> | 1.67 | 0.05 | 11.21 | 0.55 | 0.73 | 0.06 |
| <b>V124</b> | 1.80 | 0.05 | 12.83 | 0.51 | 0.64 | 0.06 |
| <b>G126</b> | 1.76 | 0.10 | 12.50 | 0.54 | 0.85 | 0.11 |
| <b>T127</b> | 1.70 | 0.08 | 12.80 | 0.23 | 0.52 | 0.09 |
| <b>G129</b> | 1.64 | 0.09 | 9.48  | 0.26 | 0.69 | 0.06 |
| <b>E131</b> |      |      |       |      |      |      |
| <b>G133</b> | 1.78 | 0.06 | 14.19 | 0.81 | 0.63 | 0.11 |

|                |             |             |              |             |             |             |
|----------------|-------------|-------------|--------------|-------------|-------------|-------------|
| <b>Y134</b>    | 1.67        | 0.03        | 10.69        | 0.28        | 0.76        | 0.05        |
| <b>R135</b>    | 1.57        | 0.04        | 10.91        | 0.35        | 0.82        | 0.07        |
| <b>L136</b>    | 1.64        | 0.04        | 11.65        | 0.34        | 0.73        | 0.06        |
| <b>W137</b>    | 1.65        | 0.04        | 11.02        | 0.52        | 0.72        | 0.07        |
| <b>T138</b>    | 1.74        | 0.05        | 10.77        | 0.19        | 0.84        | 0.06        |
| <b>T139</b>    | 1.67        | 0.04        | 12.62        | 0.45        | 0.73        | 0.07        |
| <b>D140</b>    | 1.66        | 0.03        | 10.47        | 0.21        | 0.59        | 0.05        |
| <b>Y141</b>    | 1.52        | 0.04        | 10.46        | 0.27        | 0.73        | 0.05        |
| <b>D142</b>    | 1.75        | 0.04        | 10.31        | 0.32        | 0.72        | 0.05        |
| <b>N143</b>    | 1.41        | 0.02        | 8.44         | 0.10        | 0.62        | 0.04        |
| <b>I144</b>    | 1.60        | 0.04        | 9.28         | 0.15        | 0.69        | 0.04        |
| <b>A146</b>    | 1.89        | 0.08        | 10.92        | 0.20        | 0.88        | 0.06        |
| <b>C148</b>    | 1.67        | 0.04        | 17.33        | 0.38        | 0.75        | 0.06        |
| <b>L149</b>    | 1.76        | 0.04        | 13.55        | 0.33        | 0.80        | 0.05        |
| <b>N150</b>    | 1.78        | 0.03        | 10.79        | 0.19        | 0.83        | 0.04        |
| <b>K151</b>    | 1.72        | 0.04        | 10.88        | 0.27        | 0.76        | 0.05        |
| <b>F152</b>    | 1.75        | 0.04        | 10.91        | 0.16        | 0.75        | 0.05        |
| <b>N153</b>    | 1.81        | 0.04        | 10.99        | 0.32        | 0.82        | 0.05        |
| <b>E154</b>    | 1.69        | 0.02        | 10.71        | 0.15        | 0.81        | 0.04        |
| <b>Y155</b>    |             |             |              |             |             |             |
| <b>A156</b>    |             |             |              |             |             |             |
| <b>V157</b>    | 1.51        | 0.02        | 10.02        | 0.12        | 0.74        | 0.03        |
| <b>R159</b>    | 1.66        | 0.03        | 9.72         | 0.15        | 0.67        | 0.04        |
| <b>E160</b>    | 1.57        | 0.07        | 9.47         | 0.24        | 0.76        | 0.07        |
| <b>R162</b>    | 1.77        | 0.04        | 10.74        | 0.35        | 0.70        | 0.07        |
| <b>D163</b>    | 1.67        | 0.06        | 10.88        | 0.15        | 0.92        | 0.06        |
| <b>V164</b>    | 1.58        | 0.04        | 10.19        | 0.32        | 0.75        | 0.09        |
| <b>F165</b>    | 1.83        | 0.13        | 10.82        | 0.69        | 0.63        | 0.15        |
| <b>T166</b>    | 1.53        | 0.04        | 9.92         | 0.17        | 0.67        | 0.05        |
| <b>S167</b>    | 1.67        | 0.10        | 10.80        | 0.44        | 0.72        | 0.07        |
| <b>A168</b>    | 1.83        | 0.08        | 11.20        | 0.11        | 0.77        | 0.05        |
| <b>C169</b>    |             |             |              |             |             |             |
| <b>L170</b>    | 1.62        | 0.03        | 9.66         | 0.22        | 0.62        | 0.04        |
| <b>E171</b>    | 1.66        | 0.02        | 4.65         | 0.04        | 0.34        | 0.02        |
| <b>Average</b> | <b>1.69</b> | <b>0.10</b> | <b>11.06</b> | <b>1.65</b> | <b>0.73</b> | <b>0.09</b> |

**Table s3.**  $^{15}\text{N}$  amide  $R_1$  and  $R_2$  and ssNOE values for *apo* rRaHBP2(D24R) at 600 MHz, 298 K.

The error in the average values is given as the standard deviation.

| <b>Residue</b> | <b><math>R_1</math> (1/s)</b> | <b>error</b> | <b><math>R_2</math> (1/s)</b> | <b>error</b> | <b>ssNOE</b> | <b>error</b> |
|----------------|-------------------------------|--------------|-------------------------------|--------------|--------------|--------------|
| <b>D4</b>      | 1.10                          | 0.09         | 12.87                         | 0.25         | 0.81         | 0.06         |
| <b>W5</b>      | 1.20                          | 0.06         | 12.00                         | 0.49         | 0.85         | 0.03         |
| <b>A6</b>      | 1.29                          | 0.03         | 11.95                         | 0.21         | 0.83         | 0.04         |
| <b>D7</b>      | 0.89                          | 0.03         | 9.66                          | 0.12         | 0.79         | 0.04         |
| <b>E8</b>      | 1.22                          | 0.02         | 12.32                         | 0.28         | 0.90         | 0.04         |
| <b>A9</b>      | 1.34                          | 0.01         | 12.05                         | 0.15         | 0.89         | 0.03         |
| <b>A10</b>     | 1.20                          | 0.02         | 11.56                         | 0.30         | 0.82         | 0.03         |
| <b>N11</b>     | 1.31                          | 0.07         | 12.24                         | 0.29         | 0.76         | 0.04         |
| <b>G12</b>     | 1.27                          | 0.04         | 13.52                         | 0.47         | 0.81         | 0.04         |
| <b>A13</b>     | 1.44                          | 0.12         | 13.74                         | 0.64         | 0.81         | 0.05         |
| <b>H14</b>     |                               |              |                               |              |              |              |
| <b>Q15</b>     | 1.18                          | 0.03         | 12.64                         | 0.49         | 0.86         | 0.04         |
| <b>D16</b>     | 1.28                          | 0.03         | 11.77                         | 0.20         | 0.84         | 0.04         |
| <b>A17</b>     | 1.21                          | 0.02         | 12.97                         | 0.43         | 0.89         | 0.04         |
| <b>K19</b>     | 1.22                          | 0.03         | 13.19                         | 0.26         | 0.81         | 0.04         |
| <b>S20</b>     | 1.20                          | 0.03         | 14.04                         | 0.36         | 0.76         | 0.05         |
| <b>L21</b>     | 1.35                          | 0.03         | 14.25                         | 0.79         | 0.79         | 0.05         |
| <b>K22</b>     | 1.24                          | 0.02         | 13.06                         | 0.21         | 0.90         | 0.04         |
| <b>A23</b>     | 1.27                          | 0.05         | 12.92                         | 0.33         | 0.77         | 0.05         |
| <b>R24</b>     | 1.26                          | 0.06         | 13.06                         | 0.33         | 0.79         | 0.05         |
| <b>V25</b>     | 1.24                          | 0.03         | 14.20                         | 0.31         | 0.80         | 0.05         |
| <b>E26</b>     | 1.18                          | 0.03         | 11.49                         | 0.24         | 0.69         | 0.04         |
| <b>N27</b>     | 1.19                          | 0.04         | 11.59                         | 0.15         | 0.70         | 0.04         |
| <b>V28</b>     | 1.17                          | 0.02         | 10.79                         | 0.22         | 0.81         | 0.04         |
| <b>Y29</b>     | 1.25                          | 0.04         | 12.08                         | 0.58         | 0.78         | 0.05         |
| <b>Y30</b>     | 1.35                          | 0.05         | 11.94                         | 0.46         | 0.77         | 0.05         |
| <b>M31</b>     | 1.33                          | 0.05         | 11.79                         | 0.53         | 0.76         | 0.05         |
| <b>V32</b>     | 1.17                          | 0.05         | 15.19                         | 2.07         | 0.74         | 0.09         |
| <b>K33</b>     | 1.24                          | 0.02         | 13.15                         | 0.47         | 0.81         | 0.05         |
| <b>A34</b>     | 1.22                          | 0.03         | 12.31                         | 0.17         | 0.79         | 0.04         |
| <b>T35</b>     | 1.11                          | 0.07         | 11.25                         | 0.43         | 0.82         | 0.10         |
| <b>Y36</b>     | 1.28                          | 0.09         | 13.10                         | 0.95         | 0.80         | 0.10         |
| <b>K37</b>     | 1.21                          | 0.07         | 12.03                         | 0.63         | 0.78         | 0.10         |
| <b>N38</b>     | 1.53                          | 0.82         | 12.85                         | 2.00         | 0.50         | 0.27         |
| <b>D39</b>     | 1.19                          | 0.07         | 13.73                         | 0.53         | 0.73         | 0.06         |
| <b>N44</b>     | 1.40                          | 0.10         | 13.67                         | 0.79         | 0.84         | 0.09         |
| <b>D45</b>     | 1.29                          | 0.04         | 11.58                         | 0.81         | 0.92         | 0.06         |
| <b>F46</b>     | 1.23                          | 0.03         | 12.42                         | 0.28         | 0.92         | 0.04         |
| <b>T47</b>     | 1.30                          | 0.07         | 12.77                         | 0.67         | 0.73         | 0.06         |
| <b>V49</b>     | 1.26                          | 0.06         | 10.73                         | 0.49         | 0.80         | 0.05         |
| <b>G50</b>     | 1.42                          | 0.14         |                               |              | 0.69         | 0.16         |
| <b>V51</b>     | 1.32                          | 0.05         | 14.27                         | 0.53         | 0.80         | 0.05         |
| <b>M52</b>     | 1.29                          | 0.04         | 12.59                         | 0.26         | 0.74         | 0.06         |
| <b>A53</b>     | 1.18                          | 0.14         | 13.19                         | 1.51         | 0.55         | 0.15         |
| <b>N54</b>     | 1.31                          | 0.04         | 11.33                         | 0.32         | 0.71         | 0.05         |
| <b>V56</b>     | 1.27                          | 0.02         | 10.69                         | 0.26         | 0.74         | 0.04         |
| <b>N57</b>     | 1.21                          | 0.04         | 12.19                         | 0.62         | 0.85         | 0.06         |
| <b>E58</b>     | 1.29                          | 0.06         | 12.58                         | 0.39         | 0.83         | 0.04         |
| <b>D59</b>     | 1.23                          | 0.01         | 11.72                         | 0.13         | 0.76         | 0.03         |
| <b>E60</b>     | 1.14                          | 0.02         | 11.19                         | 0.17         | 0.75         | 0.04         |
| <b>K61</b>     | 1.26                          | 0.03         | 11.50                         | 0.17         | 0.78         | 0.04         |
| <b>S62</b>     | 1.28                          | 0.03         | 12.29                         | 0.22         | 0.81         | 0.04         |
| <b>I63</b>     | 1.29                          | 0.03         | 11.90                         | 0.56         | 0.86         | 0.07         |
| <b>Q64</b>     |                               |              |                               |              |              |              |



|             |      |      |       |       |      |      |
|-------------|------|------|-------|-------|------|------|
| <b>A65</b>  | 1.29 | 0.02 | 11.65 | 0.39  | 0.75 | 0.04 |
| <b>E66</b>  | 1.25 | 0.05 | 11.29 | 0.48  | 0.87 | 0.08 |
| <b>F67</b>  | 1.20 | 0.06 | 11.22 | 0.82  | 1.09 | 0.14 |
| <b>L68</b>  |      |      | 12.81 | 0.852 | 0.75 | 0.09 |
| <b>F69</b>  |      |      |       |       |      |      |
| <b>M70</b>  | 1.25 | 0.04 | 13.26 | 0.73  | 0.79 | 0.06 |
| <b>N71</b>  |      |      |       |       |      |      |
| <b>N72</b>  | 1.30 | 0.05 | 12.65 | 0.47  | 0.80 | 0.06 |
| <b>A73</b>  |      |      | 12.05 | 0.22  | 0.82 | 0.03 |
| <b>D74</b>  | 1.22 | 0.02 | 11.26 | 0.22  | 0.83 | 0.04 |
| <b>T75</b>  | 1.28 | 0.12 | 12.68 | 0.46  | 0.71 | 0.07 |
| <b>N76</b>  |      |      |       |       |      |      |
| <b>M77</b>  | 1.24 | 0.02 | 11.92 | 0.30  | 0.81 | 0.04 |
| <b>Q78</b>  | 1.26 | 0.06 | 12.05 | 0.84  | 0.85 | 0.07 |
| <b>F79</b>  |      |      |       |       |      |      |
| <b>A80</b>  | 1.24 | 0.03 | 12.14 | 0.44  | 0.84 | 0.07 |
| <b>T81</b>  | 1.22 | 0.03 | 12.13 | 0.44  | 0.78 | 0.06 |
| <b>E82</b>  | 1.26 | 0.07 | 11.22 | 1.14  | 0.77 | 0.09 |
| <b>K83</b>  | 1.06 | 0.13 | 10.92 | 1.34  | 0.40 | 0.14 |
| <b>V84</b>  | 1.24 | 0.14 | 15.55 | 2.22  | 0.74 | 0.17 |
| <b>T85</b>  | 1.18 | 0.08 | 13.32 | 0.55  | 0.86 | 0.11 |
| <b>A86</b>  | 1.35 | 0.02 | 13.15 | 0.52  | 0.78 | 0.05 |
| <b>V87</b>  |      |      |       |       |      |      |
| <b>K88</b>  | 1.27 | 0.04 | 11.63 | 0.49  | 0.81 | 0.05 |
| <b>M89</b>  | 1.26 | 0.05 | 11.04 | 0.52  | 0.81 | 0.04 |
| <b>Y90</b>  | 1.29 | 0.05 | 11.98 | 0.23  | 0.83 | 0.03 |
| <b>G91</b>  | 1.47 | 0.10 | 12.30 | 0.80  | 0.89 | 0.05 |
| <b>Y92</b>  | 1.23 | 0.04 | 13.28 | 0.34  | 0.90 | 0.04 |
| <b>N93</b>  | 1.11 | 0.06 | 12.17 | 0.60  | 0.78 | 0.06 |
| <b>R94</b>  | 1.19 | 0.04 | 12.10 | 0.33  | 0.79 | 0.04 |
| <b>E95</b>  | 1.24 | 0.03 | 11.76 | 0.19  | 0.79 | 0.03 |
| <b>N96</b>  | 1.30 | 0.06 | 12.34 | 0.92  | 0.86 | 0.07 |
| <b>A97</b>  |      |      |       |       |      |      |
| <b>F98</b>  |      |      |       |       |      |      |
| <b>R99</b>  | 1.26 | 0.03 | 12.51 | 0.28  | 0.82 | 0.05 |
| <b>E101</b> | 1.31 | 0.05 | 12.77 | 0.49  | 0.67 | 0.07 |
| <b>T102</b> | 1.29 | 0.04 | 12.83 | 0.57  | 0.68 | 0.05 |
| <b>E103</b> | 1.34 | 0.09 | 13.98 | 1.12  | 0.67 | 0.10 |
| <b>D104</b> |      |      |       |       |      |      |
| <b>G105</b> | 1.26 | 0.12 | 11.90 | 0.58  | 0.76 | 0.11 |
| <b>Q106</b> | 1.19 | 0.06 | 12.19 | 0.36  | 0.73 | 0.08 |
| <b>V107</b> | 1.21 | 0.02 | 10.89 | 0.32  | 0.77 | 0.04 |
| <b>F108</b> |      |      |       |       |      |      |
| <b>V111</b> | 1.19 | 0.04 | 20.80 | 0.73  | 0.91 | 0.07 |
| <b>I112</b> | 1.26 | 0.04 | 11.87 | 0.73  | 0.84 | 0.06 |
| <b>A113</b> | 1.29 | 0.03 | 12.98 | 0.51  | 0.95 | 0.06 |
| <b>Y114</b> |      |      |       |       |      |      |
| <b>S115</b> | 1.16 | 0.03 | 12.70 | 0.33  | 0.83 | 0.05 |
| <b>D116</b> | 1.20 | 0.02 | 13.15 | 0.46  | 0.75 | 0.04 |
| <b>D117</b> | 1.36 | 0.09 | 15.71 | 0.67  | 0.67 | 0.07 |
| <b>N118</b> | 1.27 | 0.04 | 11.73 | 0.18  | 0.71 | 0.05 |
| <b>C119</b> | 1.30 | 0.07 | 24.97 | 1.53  | 0.82 | 0.06 |
| <b>D120</b> | 1.23 | 0.28 | 18.95 | 4.24  | 0.75 | 0.24 |
| <b>V121</b> | 1.20 | 0.06 | 12.99 | 0.37  | 0.84 | 0.05 |
| <b>I122</b> | 1.18 | 0.04 | 13.80 | 0.71  | 0.91 | 0.06 |
| <b>Y123</b> | 1.25 | 0.04 | 12.77 | 0.47  | 0.90 | 0.05 |
| <b>V124</b> | 1.28 | 0.06 | 13.44 | 0.77  | 0.80 | 0.06 |
| <b>G126</b> | 1.24 | 0.09 | 15.47 | 1.39  | 0.64 | 0.10 |
| <b>T127</b> | 1.41 | 0.10 | 15.96 | 1.47  | 0.58 | 0.10 |
| <b>G129</b> | 1.40 | 0.14 | 11.27 | 0.30  | 0.59 | 0.05 |

|                |             |             |              |             |             |             |
|----------------|-------------|-------------|--------------|-------------|-------------|-------------|
| <b>E131</b>    |             |             |              |             |             |             |
| <b>G133</b>    | 1.23        | 0.06        | 15.81        | 1.80        | 0.54        | 0.10        |
| <b>Y134</b>    | 1.20        | 0.03        | 12.04        | 0.289       | 0.77        | 0.04        |
| <b>R135</b>    | 1.14        | 0.04        | 13.32        | 0.53        | 0.79        | 0.05        |
| <b>L136</b>    | 1.15        | 0.03        | 12.73        | 0.43        | 0.79        | 0.04        |
| <b>W137</b>    | 1.21        | 0.06        | 12.84        | 0.47        | 0.81        | 0.06        |
| <b>T138</b>    | 1.21        | 0.05        | 13.61        | 0.52        | 0.91        | 0.06        |
| <b>T139</b>    | 1.23        | 0.04        | 14.45        | 0.87        | 0.66        | 0.06        |
| <b>D140</b>    | 1.28        | 0.02        | 12.21        | 0.50        | 0.73        | 0.05        |
| <b>Y141</b>    | 1.18        | 0.05        | 12.06        | 0.46        | 0.73        | 0.04        |
| <b>D142</b>    | 1.26        | 0.02        | 11.47        | 0.30        | 0.84        | 0.04        |
| <b>N143</b>    | 1.06        | 0.01        | 9.74         | 0.15        | 0.68        | 0.03        |
| <b>I144</b>    | 1.23        | 0.01        | 10.74        | 0.31        | 0.76        | 0.04        |
| <b>A146</b>    | 1.40        | 0.05        | 12.72        | 0.37        | 0.84        | 0.04        |
| <b>C148</b>    | 1.31        | 0.05        | 22.43        | 0.72        | 0.72        | 0.05        |
| <b>L149</b>    | 1.30        | 0.04        | 15.44        | 0.56        | 0.76        | 0.05        |
| <b>N150</b>    | 1.30        | 0.03        | 11.80        | 0.23        | 0.83        | 0.04        |
| <b>K151</b>    | 1.27        | 0.03        | 12.42        | 0.47        | 0.82        | 0.05        |
| <b>F152</b>    | 1.25        | 0.03        | 12.37        | 0.21        | 0.83        | 0.05        |
| <b>N153</b>    | 1.34        | 0.02        | 11.93        | 0.25        | 0.80        | 0.04        |
| <b>E154</b>    | 1.24        | 0.03        | 11.48        | 0.30        | 0.82        | 0.04        |
| <b>Y155</b>    |             |             |              |             |             |             |
| <b>A156</b>    |             |             |              |             |             |             |
| <b>V157</b>    | 1.11        | 0.02        | 11.36        | 0.17        | 0.83        | 0.03        |
| <b>R159</b>    | 1.22        | 0.01        | 11.17        | 0.17        | 0.85        | 0.04        |
| <b>E160</b>    | 1.19        | 0.08        | 10.18        | 0.33        | 0.68        | 0.05        |
| <b>R162</b>    | 1.33        | 0.04        | 12.26        | 0.50        | 0.90        | 0.08        |
| <b>D163</b>    | 1.22        | 0.03        | 12.40        | 0.39        | 0.80        | 0.04        |
| <b>V164</b>    | 1.08        | 0.03        | 12.30        | 0.60        | 0.77        | 0.07        |
| <b>F165</b>    | 1.38        | 0.12        | 12.24        | 1.55        | 0.58        | 0.10        |
| <b>T166</b>    | 1.16        | 0.04        | 11.34        | 0.45        | 0.73        | 0.04        |
| <b>S167</b>    | 1.27        | 0.06        | 12.41        | 0.54        | 0.87        | 0.06        |
| <b>A168</b>    | 1.33        | 0.07        | 13.25        | 0.28        | 0.78        | 0.04        |
| <b>C169</b>    | 1.31        | 0.03        | 10.68        | 0.34        | 0.65        | 0.03        |
| <b>L170</b>    | 1.23        | 0.02        | 10.56        | 0.23        | 0.61        | 0.03        |
| <b>E171</b>    | 1.37        | 0.01        | 5.48         | 0.06        | 0.33        | 0.02        |
| <b>Average</b> | <b>1.25</b> | <b>0.08</b> | <b>12.64</b> | <b>2.12</b> | <b>0.78</b> | <b>0.10</b> |

**Table s4.**  $^{15}\text{N}$  amide  $R_1$  and  $R_2$  and ssNOE values for rRaHBP2(D24R) in complex with histamine at 500 MHz, 298 K. The error in the average values is given as the standard deviation.

| <b>Residue</b> | <b><math>R_1</math> (1/s)</b> | <b>error</b> | <b><math>R_2</math> (1/s)</b> | <b>error</b> | <b>ssNOE</b> | <b>error</b> |
|----------------|-------------------------------|--------------|-------------------------------|--------------|--------------|--------------|
| <b>D4</b>      | 1.74                          | 0.12         | 11.55                         | 0.60         | 0.80         | 0.08         |
| <b>W5</b>      | 1.52                          | 0.05         | 10.64                         | 0.15         | 0.78         | 0.04         |
| <b>A6</b>      | 1.82                          | 0.03         | 10.79                         | 0.13         | 0.77         | 0.04         |
| <b>D7</b>      | 1.30                          | 0.04         | 8.57                          | 0.10         | 0.69         | 0.05         |
| <b>E8</b>      | 1.72                          | 0.02         | 10.31                         | 0.25         | 0.80         | 0.05         |
| <b>A9</b>      | 1.82                          | 0.03         | 10.71                         | 0.23         | 0.86         | 0.04         |
| <b>A10</b>     | 1.62                          | 0.03         | 10.17                         | 0.16         | 0.77         | 0.04         |
| <b>N11</b>     | 1.70                          | 0.04         | 10.56                         | 0.31         | 0.81         | 0.06         |
| <b>G12</b>     | 1.72                          | 0.06         | 11.38                         | 0.21         | 0.74         | 0.05         |
| <b>A13</b>     | 2.01                          | 0.09         | 12.83                         | 0.14         | 0.90         | 0.08         |
| <b>H14</b>     | 1.64                          | 0.04         | 10.53                         | 0.29         | 0.84         | 0.06         |
| <b>D16</b>     | 1.68                          | 0.03         | 10.29                         | 0.21         | 0.74         | 0.04         |
| <b>A17</b>     | 1.75                          | 0.02         | 10.88                         | 0.17         | 0.73         | 0.04         |
| <b>W18</b>     | 1.68                          | 0.02         | 11.49                         | 0.17         | 0.90         | 0.06         |
| <b>K19</b>     | 1.67                          | 0.02         | 11.32                         | 0.17         | 0.78         | 0.04         |
| <b>S20</b>     | 1.63                          | 0.01         | 10.79                         | 0.20         | 0.73         | 0.04         |
| <b>L21</b>     | 1.72                          | 0.03         | 12.09                         | 0.15         | 0.75         | 0.04         |
| <b>K22</b>     | 1.66                          | 0.04         | 11.57                         | 0.16         | 0.88         | 0.05         |
| <b>A23</b>     | 1.72                          | 0.02         | 11.23                         | 0.21         | 0.82         | 0.04         |
| <b>R24</b>     |                               |              |                               |              |              |              |
| <b>E26</b>     |                               |              |                               |              |              |              |
| <b>N27</b>     | 1.56                          | 0.02         | 9.99                          | 0.16         | 0.68         | 0.05         |
| <b>V28</b>     |                               |              |                               |              |              |              |
| <b>Y29</b>     | 1.74                          | 0.02         | 10.55                         | 0.21         | 0.69         | 0.06         |
| <b>Y30</b>     | 1.73                          | 0.05         | 10.67                         | 0.26         | 0.73         | 0.06         |
| <b>M31</b>     |                               |              |                               |              |              |              |
| <b>V32</b>     | 1.62                          | 0.06         | 12.46                         | 0.32         | 0.72         | 0.06         |
| <b>K33</b>     | 1.69                          | 0.02         | 11.81                         | 0.30         | 0.80         | 0.05         |
| <b>A34</b>     | 1.68                          | 0.05         | 11.23                         | 0.27         | 0.77         | 0.05         |
| <b>T35</b>     | 1.63                          | 0.03         | 11.38                         | 0.22         | 0.75         | 0.06         |
| <b>K37</b>     | 1.80                          | 0.04         | 10.37                         | 0.25         | 0.91         | 0.08         |
| <b>N38</b>     | 1.63                          | 0.03         | 11.40                         | 0.19         | 0.78         | 0.06         |
| <b>D39</b>     |                               |              |                               |              |              |              |
| <b>V41</b>     | 1.73                          | 0.05         | 11.09                         | 0.27         | 0.87         | 0.07         |
| <b>W42</b>     | 1.58                          | 0.05         | 11.49                         | 0.33         | 0.66         | 0.06         |
| <b>G43</b>     | 1.74                          | 0.03         | 12.09                         | 0.22         | 0.85         | 0.05         |
| <b>N44</b>     | 1.69                          | 0.06         | 10.35                         | 0.22         | 0.69         | 0.05         |
| <b>D45</b>     | 1.64                          | 0.05         | 11.23                         | 0.21         | 0.80         | 0.07         |
| <b>F46</b>     | 1.63                          | 0.03         | 10.64                         | 0.20         | 0.72         | 0.04         |
| <b>T47</b>     | 1.69                          | 0.03         | 10.24                         | 0.38         | 0.73         | 0.06         |
| <b>C48</b>     | 1.79                          | 0.06         | 10.06                         | 0.24         | 0.84         | 0.08         |
| <b>V49</b>     | 1.56                          | 0.03         | 10.31                         | 0.31         | 0.90         | 0.05         |
| <b>G50</b>     | 1.84                          | 0.05         | 10.89                         | 0.21         | 0.72         | 0.05         |
| <b>V51</b>     | 1.79                          | 0.05         | 10.60                         | 0.25         | 0.86         | 0.06         |
| <b>M52</b>     | 1.78                          | 0.02         | 10.79                         | 0.19         | 0.77         | 0.06         |
| <b>A53</b>     | 1.65                          | 0.03         | 9.48                          | 0.24         | 0.79         | 0.06         |
| <b>N54</b>     | 1.80                          | 0.03         | 9.19                          | 0.18         | 0.70         | 0.05         |
| <b>D55</b>     | 1.66                          | 0.02         | 8.32                          | 0.07         | 0.62         | 0.04         |
| <b>N57</b>     | 1.67                          | 0.05         | 9.92                          | 0.36         | 0.76         | 0.06         |
| <b>E58</b>     | 1.80                          | 0.09         | 10.93                         | 0.20         | 0.78         | 0.06         |
| <b>D59</b>     | 1.62                          | 0.02         | 10.27                         | 0.11         | 0.73         | 0.03         |
| <b>E60</b>     | 1.58                          | 0.04         | 10.23                         | 0.11         | 0.76         | 0.05         |
| <b>K61</b>     | 1.71                          | 0.05         | 10.40                         | 0.19         | 0.81         | 0.06         |
| <b>S62</b>     | 1.79                          | 0.03         | 10.50                         | 0.20         | 0.75         | 0.05         |
| <b>I63</b>     | 1.75                          | 0.04         | 10.39                         | 0.31         | 0.73         | 0.07         |
| <b>Q64</b>     | 1.50                          | 0.04         | 9.62                          | 0.16         | 0.65         | 0.04         |

|             |      |      |       |      |      |      |
|-------------|------|------|-------|------|------|------|
| <b>A65</b>  | 1.74 | 0.02 | 9.75  | 0.15 | 0.74 | 0.05 |
| <b>E66</b>  | 1.73 | 0.03 | 9.97  | 0.23 | 0.75 | 0.05 |
| <b>F67</b>  | 1.75 | 0.05 | 10.28 | 0.32 | 0.74 | 0.06 |
| <b>L68</b>  | 1.70 | 0.05 | 11.12 | 0.18 | 0.79 | 0.07 |
| <b>F69</b>  | 1.63 | 0.03 | 10.59 | 0.27 | 0.74 | 0.05 |
| <b>M70</b>  | 1.71 | 0.04 | 11.82 | 0.26 | 0.76 | 0.07 |
| <b>N71</b>  | 1.60 | 0.04 | 10.58 | 0.28 | 0.72 | 0.04 |
| <b>N72</b>  | 1.67 | 0.03 | 10.34 | 0.22 | 0.64 | 0.05 |
| <b>A73</b>  |      |      |       |      |      |      |
| <b>D74</b>  | 1.60 | 0.03 | 9.37  | 0.07 | 0.59 | 0.03 |
| <b>T75</b>  | 1.59 | 0.09 | 9.85  | 0.33 | 0.69 | 0.07 |
| <b>M77</b>  | 1.68 | 0.02 | 9.89  | 0.10 | 0.76 | 0.05 |
| <b>Q78</b>  | 1.65 | 0.03 | 10.51 | 0.29 | 0.68 | 0.06 |
| <b>F79</b>  | 1.62 | 0.03 | 9.88  | 0.28 | 0.73 | 0.06 |
| <b>A80</b>  | 1.65 | 0.03 | 10.03 | 0.11 | 0.89 | 0.06 |
| <b>T81</b>  | 1.63 | 0.03 | 9.64  | 0.23 | 0.76 | 0.05 |
| <b>E82</b>  | 1.76 | 0.04 | 10.38 | 0.22 | 0.75 | 0.05 |
| <b>K83</b>  | 1.64 | 0.03 | 10.14 | 0.28 | 0.84 | 0.06 |
| <b>V84</b>  | 1.78 | 0.04 | 10.31 | 0.15 | 0.76 | 0.05 |
| <b>T85</b>  |      |      |       |      |      |      |
| <b>A86</b>  | 1.74 | 0.04 | 10.37 | 0.09 | 0.82 | 0.05 |
| <b>K88</b>  | 1.72 | 0.04 | 10.60 | 0.30 | 0.94 | 0.08 |
| <b>M89</b>  | 1.62 | 0.03 | 9.64  | 0.19 | 0.77 | 0.06 |
| <b>Y90</b>  |      |      |       |      |      |      |
| <b>G91</b>  | 1.91 | 0.07 | 11.91 | 0.23 | 0.79 | 0.06 |
| <b>Y92</b>  | 1.75 | 0.05 | 11.58 | 0.20 | 0.84 | 0.05 |
| <b>N93</b>  | 1.60 | 0.07 | 10.45 | 0.35 | 0.68 | 0.06 |
| <b>R94</b>  |      |      |       |      |      |      |
| <b>E95</b>  | 1.65 | 0.04 | 10.02 | 0.14 | 0.70 | 0.04 |
| <b>N96</b>  | 1.75 | 0.07 | 10.53 | 0.32 | 0.70 | 0.07 |
| <b>A97</b>  |      |      |       |      |      |      |
| <b>F98</b>  |      |      |       |      |      |      |
| <b>R99</b>  | 1.75 | 0.04 | 10.69 | 0.24 | 0.82 | 0.06 |
| <b>Y100</b> | 1.70 | 0.04 | 10.73 | 0.28 | 0.87 | 0.07 |
| <b>E101</b> | 1.72 | 0.02 | 10.27 | 0.24 | 0.83 | 0.06 |
| <b>T102</b> | 1.75 | 0.02 | 10.85 | 0.19 | 0.88 | 0.06 |
| <b>E103</b> | 1.78 | 0.02 | 10.81 | 0.29 | 0.83 | 0.06 |
| <b>D104</b> | 1.66 | 0.02 | 9.54  | 0.16 | 0.75 | 0.05 |
| <b>G105</b> | 1.66 | 0.03 | 9.68  | 0.11 | 0.67 | 0.04 |
| <b>Q106</b> | 1.69 | 0.03 | 10.72 | 0.14 | 0.69 | 0.05 |
| <b>V107</b> | 1.60 | 0.04 | 9.63  | 0.17 | 0.71 | 0.05 |
| <b>F108</b> | 1.72 | 0.04 | 10.55 | 0.18 | 0.86 | 0.06 |
| <b>T109</b> | 1.71 | 0.06 | 10.33 | 0.23 | 0.78 | 0.06 |
| <b>D110</b> | 1.73 | 0.05 | 10.13 | 0.25 | 0.81 | 0.05 |
| <b>V111</b> | 1.70 | 0.03 | 11.08 | 0.31 | 0.75 | 0.05 |
| <b>I112</b> |      |      |       |      |      |      |
| <b>A113</b> | 1.70 | 0.04 | 12.48 | 0.42 | 0.69 | 0.06 |
| <b>Y114</b> | 1.64 | 0.03 | 11.79 | 0.16 | 0.78 | 0.04 |
| <b>S115</b> | 1.58 | 0.02 | 11.37 | 0.27 | 0.70 | 0.05 |
| <b>D116</b> | 1.70 | 0.06 | 11.38 | 0.37 | 0.85 | 0.06 |
| <b>D117</b> | 1.86 | 0.10 | 13.24 | 0.26 | 0.55 | 0.07 |
| <b>N118</b> | 1.80 | 0.04 | 10.22 | 0.26 | 0.74 | 0.07 |
| <b>C119</b> | 1.68 | 0.04 | 17.16 | 0.56 | 0.80 | 0.05 |
| <b>D120</b> | 1.66 | 0.05 | 16.23 | 0.38 | 0.81 | 0.06 |
| <b>V121</b> | 1.64 | 0.03 | 11.37 | 0.24 | 0.67 | 0.05 |
| <b>I122</b> | 1.65 | 0.04 | 10.52 | 0.21 | 0.83 | 0.06 |
| <b>Y123</b> | 1.63 | 0.05 | 10.87 | 0.33 | 0.75 | 0.06 |
| <b>V124</b> | 1.69 | 0.04 | 11.08 | 0.35 | 0.81 | 0.06 |
| <b>G126</b> | 1.73 | 0.05 | 10.64 | 0.15 | 0.74 | 0.06 |
| <b>T127</b> | 1.76 | 0.05 | 9.70  | 0.17 | 0.62 | 0.05 |

|                |             |             |              |             |             |             |
|----------------|-------------|-------------|--------------|-------------|-------------|-------------|
| <b>D128</b>    | 1.79        | 0.05        | 9.89         | 0.31        | 0.63        | 0.06        |
| <b>G129</b>    | 1.63        | 0.04        | 10.13        | 0.14        | 0.74        | 0.05        |
| <b>N130</b>    | 1.60        | 0.04        | 10.46        | 0.25        | 0.70        | 0.04        |
| <b>E132</b>    | 1.63        | 0.03        | 9.74         | 0.17        | 0.72        | 0.05        |
| <b>G133</b>    | 1.73        | 0.04        | 11.19        | 0.28        | 0.79        | 0.05        |
| <b>Y134</b>    | 1.72        | 0.03        | 10.56        | 0.28        | 0.83        | 0.06        |
| <b>E135</b>    | 1.56        | 0.04        | 10.65        | 0.18        | 0.74        | 0.06        |
| <b>L136</b>    | 1.64        | 0.03        | 11.62        | 0.24        | 0.73        | 0.05        |
| <b>W137</b>    | 1.67        | 0.05        | 12.20        | 0.31        | 0.71        | 0.06        |
| <b>T138</b>    | 1.59        | 0.04        | 10.95        | 0.15        | 0.74        | 0.04        |
| <b>T139</b>    | 1.66        | 0.03        | 12.49        | 0.25        | 0.80        | 0.07        |
| <b>D140</b>    | 1.67        | 0.03        | 10.75        | 0.20        | 0.63        | 0.05        |
| <b>Y141</b>    | 1.59        | 0.05        | 9.82         | 0.37        | 0.72        | 0.05        |
| <b>D142</b>    | 1.74        | 0.03        | 10.50        | 0.26        | 0.68        | 0.05        |
| <b>N143</b>    | 1.41        | 0.02        | 8.57         | 0.07        | 0.61        | 0.04        |
| <b>I144</b>    | 1.57        | 0.02        | 9.79         | 0.08        | 0.73        | 0.04        |
| <b>A146</b>    | 1.94        | 0.07        | 10.66        | 0.46        | 0.73        | 0.05        |
| <b>C148</b>    | 1.79        | 0.07        | 19.30        | 0.42        | 0.67        | 0.06        |
| <b>L149</b>    | 1.78        | 0.03        | 13.96        | 0.23        | 0.81        | 0.06        |
| <b>N150</b>    | 1.75        | 0.02        | 10.89        | 0.12        | 0.74        | 0.03        |
| <b>K151</b>    | 1.74        | 0.04        | 10.78        | 0.26        | 0.79        | 0.05        |
| <b>F152</b>    | 1.82        | 0.05        | 11.67        | 0.39        | 0.83        | 0.07        |
| <b>N153</b>    | 1.76        | 0.03        | 10.56        | 0.19        | 0.80        | 0.05        |
| <b>E154</b>    | 1.68        | 0.03        | 10.81        | 0.09        | 0.82        | 0.05        |
| <b>Y155</b>    | 1.74        | 0.04        | 11.02        | 0.09        | 0.81        | 0.04        |
| <b>A156</b>    | 1.77        | 0.03        | 10.92        | 0.05        | 0.78        | 0.04        |
| <b>V157</b>    | 1.54        | 0.03        | 10.44        | 0.17        | 0.78        | 0.03        |
| <b>E160</b>    | 1.56        | 0.08        | 9.16         | 0.34        | 0.64        | 0.08        |
| <b>T161</b>    | 1.48        | 0.03        | 7.69         | 0.12        | 0.62        | 0.04        |
| <b>R162</b>    | 1.72        | 0.05        | 10.82        | 0.28        | 0.81        | 0.07        |
| <b>D163</b>    | 1.64        | 0.04        | 10.79        | 0.27        | 0.81        | 0.05        |
| <b>V164</b>    | 1.63        | 0.05        | 10.56        | 0.36        | 0.81        | 0.08        |
| <b>F165</b>    |             |             |              |             |             |             |
| <b>T166</b>    | 1.61        | 0.03        | 10.26        | 0.30        | 0.77        | 0.06        |
| <b>S167</b>    | 1.68        | 0.13        | 11.55        | 0.48        | 0.72        | 0.08        |
| <b>A168</b>    | 1.90        | 0.09        | 11.57        | 0.31        | 0.67        | 0.05        |
| <b>C169</b>    |             |             |              |             |             |             |
| <b>L170</b>    | 1.60        | 0.03        | 9.27         | 0.25        | 0.67        | 0.05        |
| <b>E171</b>    | 1.64        | 0.01        | 4.86         | 0.05        | 0.34        | 0.02        |
| <b>Average</b> | <b>1.69</b> | <b>0.09</b> | <b>10.75</b> | <b>1.44</b> | <b>0.75</b> | <b>0.08</b> |

**Table s5.**  $^{15}\text{N}$  amide  $R_1$  and  $R_2$  and ssNOE values for rRaHBP2(D24R) in complex with histamine at 600 MHz, 298 K. The error in the average values is given as the standard deviation.

| <b>Residue</b> | <b><math>R_1</math> (1/s)</b> | <b>error</b> | <b><math>R_2</math> (1/s)</b> | <b>error</b> | <b>ssNOE</b> | <b>error</b> |
|----------------|-------------------------------|--------------|-------------------------------|--------------|--------------|--------------|
| <b>D4</b>      | 1.23                          | 0.11         | 13.33                         | 0.72         | 0.98         | 0.08         |
| <b>W5</b>      | 1.17                          | 0.05         | 12.63                         | 0.54         | 0.83         | 0.03         |
| <b>A6</b>      | 1.27                          | 0.04         | 12.43                         | 0.37         | 0.84         | 0.04         |
| <b>D7</b>      | 0.94                          | 0.03         | 9.53                          | 0.27         | 0.77         | 0.04         |
| <b>E8</b>      | 1.31                          | 0.03         | 12.19                         | 0.42         | 0.84         | 0.04         |
| <b>A9</b>      | 1.40                          | 0.01         | 12.26                         | 0.30         | 0.84         | 0.03         |
| <b>A10</b>     | 1.25                          | 0.02         | 11.06                         | 0.16         | 0.88         | 0.03         |
| <b>N11</b>     | 1.22                          | 0.04         | 11.55                         | 0.45         | 0.79         | 0.05         |
| <b>G12</b>     | 1.26                          | 0.04         | 13.19                         | 0.57         | 0.73         | 0.04         |
| <b>A13</b>     | 1.39                          | 0.09         | 14.05                         | 0.35         | 0.86         | 0.05         |
| <b>H14</b>     | 1.21                          | 0.04         | 12.20                         | 0.42         | 0.78         | 0.05         |
| <b>D16</b>     | 1.24                          | 0.03         | 11.82                         | 0.19         | 0.80         | 0.04         |
| <b>A17</b>     | 1.22                          | 0.03         | 12.46                         | 0.23         | 0.83         | 0.04         |
| <b>W18</b>     | 1.19                          | 0.03         | 13.34                         | 0.41         | 0.82         | 0.04         |
| <b>K19</b>     | 1.24                          | 0.02         | 13.06                         | 0.34         | 0.84         | 0.03         |
| <b>S20</b>     | 1.27                          | 0.01         | 12.96                         | 0.28         | 0.81         | 0.04         |
| <b>L21</b>     | 1.27                          | 0.02         | 14.02                         | 0.38         | 0.84         | 0.04         |
| <b>K22</b>     | 1.22                          | 0.02         | 13.02                         | 0.12         | 0.76         | 0.03         |
| <b>A23</b>     | 1.28                          | 0.02         | 12.82                         | 0.27         | 0.83         | 0.03         |
| <b>R24</b>     |                               |              |                               |              |              |              |
| <b>E26</b>     |                               |              |                               |              |              |              |
| <b>N27</b>     | 1.16                          | 0.02         | 11.22                         | 0.31         | 0.73         | 0.04         |
| <b>V28</b>     |                               |              |                               |              |              |              |
| <b>Y29</b>     | 1.28                          | 0.04         | 11.25                         | 0.27         | 0.87         | 0.05         |
| <b>Y30</b>     | 1.23                          | 0.05         | 12.40                         | 0.36         | 0.77         | 0.05         |
| <b>M31</b>     | 1.23                          | 0.02         | 13.00                         | 0.36         | 0.82         | 0.04         |
| <b>V32</b>     | 1.21                          | 0.06         | 15.68                         | 0.42         | 0.85         | 0.06         |
| <b>K33</b>     | 1.25                          | 0.03         | 13.03                         | 0.23         | 0.87         | 0.04         |
| <b>A34</b>     | 1.24                          | 0.02         | 12.61                         | 0.20         | 0.77         | 0.03         |
| <b>T35</b>     | 1.26                          | 0.02         | 11.44                         | 0.66         | 0.83         | 0.05         |
| <b>K37</b>     | 1.32                          | 0.02         | 12.83                         | 0.41         | 0.73         | 0.05         |
| <b>N38</b>     | 1.21                          | 0.03         | 12.40                         | 0.36         | 0.79         | 0.05         |
| <b>D39</b>     | 1.20                          | 0.02         | 13.41                         | 0.62         | 0.76         | 0.04         |
| <b>V41</b>     | 1.26                          | 0.04         | 12.09                         | 0.21         | 0.87         | 0.05         |
| <b>W42</b>     | 1.16                          | 0.04         | 12.99                         | 0.68         | 0.67         | 0.04         |
| <b>G43</b>     | 1.25                          | 0.04         | 12.88                         | 0.59         | 0.84         | 0.04         |
| <b>N44</b>     | 1.25                          | 0.05         | 12.16                         | 0.61         | 0.82         | 0.04         |
| <b>D45</b>     | 1.29                          | 0.04         | 12.58                         | 0.29         | 0.73         | 0.05         |
| <b>F46</b>     | 1.22                          | 0.04         | 12.08                         | 0.62         | 0.84         | 0.04         |
| <b>T47</b>     | 1.30                          | 0.03         | 12.36                         | 0.49         | 0.81         | 0.04         |
| <b>C48</b>     | 1.19                          | 0.04         | 13.47                         | 0.21         | 0.90         | 0.07         |
| <b>V49</b>     | 1.19                          | 0.10         | 11.66                         | 0.74         | 0.79         | 0.03         |
| <b>G50</b>     | 1.35                          | 0.05         | 11.84                         | 0.27         | 0.87         | 0.05         |
| <b>V51</b>     | 1.30                          | 0.03         | 12.35                         | 0.33         | 0.87         | 0.05         |
| <b>M52</b>     | 1.37                          | 0.01         | 11.75                         | 0.31         | 0.85         | 0.04         |
| <b>A53</b>     | 1.24                          | 0.02         | 10.86                         | 0.24         | 0.70         | 0.04         |
| <b>N54</b>     | 1.40                          | 0.02         | 10.46                         | 0.08         | 0.73         | 0.04         |
| <b>D55</b>     | 1.25                          | 0.03         | 9.65                          | 0.32         | 0.65         | 0.03         |
| <b>N57</b>     | 1.25                          | 0.03         | 11.50                         | 0.33         | 0.87         | 0.05         |
| <b>E58</b>     | 1.30                          | 0.03         | 12.95                         | 0.21         | 0.82         | 0.04         |
| <b>D59</b>     | 1.23                          | 0.01         | 12.13                         | 0.25         | 0.77         | 0.03         |
| <b>E60</b>     | 1.13                          | 0.02         | 11.87                         | 0.27         | 0.81         | 0.04         |
| <b>K61</b>     | 1.27                          | 0.02         | 11.27                         | 0.38         | 0.75         | 0.04         |
| <b>S62</b>     | 1.30                          | 0.03         | 12.42                         | 0.33         | 0.81         | 0.04         |

|             |      |      |       |      |      |      |
|-------------|------|------|-------|------|------|------|
| <b>I63</b>  | 1.27 | 0.03 | 12.13 | 0.50 | 0.78 | 0.05 |
| <b>Q64</b>  | 1.15 | 0.01 | 11.09 | 0.23 | 0.68 | 0.03 |
| <b>A65</b>  | 1.30 | 0.02 | 12.26 | 0.34 | 0.84 | 0.04 |
| <b>E66</b>  | 1.28 | 0.05 | 11.47 | 0.40 | 0.80 | 0.05 |
| <b>F67</b>  | 1.29 | 0.03 | 12.04 | 0.21 | 0.85 | 0.05 |
| <b>L68</b>  | 1.32 | 0.04 | 12.84 | 0.35 | 0.76 | 0.05 |
| <b>F69</b>  | 1.25 | 0.02 | 11.26 | 0.32 | 0.75 | 0.04 |
| <b>M70</b>  | 1.22 | 0.03 | 12.47 | 0.36 | 0.80 | 0.05 |
| <b>N71</b>  | 1.22 | 0.02 | 12.83 | 0.35 | 0.83 | 0.04 |
| <b>N72</b>  | 1.31 | 0.04 | 11.65 | 0.38 | 0.74 | 0.04 |
| <b>A73</b>  | 1.25 | 0.02 | 12.11 | 0.27 | 0.74 | 0.03 |
| <b>D74</b>  | 1.18 | 0.01 | 11.33 | 0.16 | 0.70 | 0.03 |
| <b>T75</b>  | 1.18 | 0.09 | 11.38 | 0.76 | 0.69 | 0.05 |
| <b>M77</b>  | 1.31 | 0.02 | 11.40 | 0.30 | 0.79 | 0.04 |
| <b>Q78</b>  | 1.31 | 0.04 | 12.03 | 0.54 | 0.84 | 0.05 |
| <b>F79</b>  | 1.27 | 0.03 | 12.00 | 0.45 | 0.85 | 0.05 |
| <b>A80</b>  | 1.32 | 0.02 | 11.10 | 0.35 | 0.80 | 0.04 |
| <b>T81</b>  | 1.19 | 0.02 | 10.84 | 0.30 | 0.77 | 0.04 |
| <b>E82</b>  | 1.25 | 0.04 | 11.46 | 0.20 | 0.86 | 0.04 |
| <b>K83</b>  | 1.27 | 0.04 | 11.99 | 0.33 | 0.88 | 0.05 |
| <b>V84</b>  | 1.29 | 0.03 | 12.10 | 0.29 | 0.79 | 0.04 |
| <b>T85</b>  |      |      |       |      |      |      |
| <b>A86</b>  | 1.31 | 0.03 | 13.16 | 0.40 | 0.80 | 0.04 |
| <b>K88</b>  | 1.29 | 0.03 | 11.31 | 0.32 | 0.84 | 0.05 |
| <b>M89</b>  | 1.18 | 0.02 | 11.57 | 0.38 | 0.81 | 0.04 |
| <b>Y90</b>  |      |      |       |      |      |      |
| <b>G91</b>  | 1.39 | 0.11 | 12.42 | 0.59 | 0.79 | 0.05 |
| <b>Y92</b>  | 1.31 | 0.03 | 13.08 | 0.40 | 0.86 | 0.04 |
| <b>N93</b>  | 1.19 | 0.03 | 11.30 | 0.55 | 0.83 | 0.06 |
| <b>R94</b>  |      |      |       |      |      |      |
| <b>E95</b>  | 1.19 | 0.02 | 11.77 | 0.17 | 0.78 | 0.03 |
| <b>N96</b>  | 1.26 | 0.04 | 12.50 | 0.52 | 0.80 | 0.06 |
| <b>A97</b>  | 1.33 | 0.03 | 12.43 | 0.41 | 0.80 | 0.03 |
| <b>F98</b>  |      |      |       |      |      |      |
| <b>R99</b>  | 1.21 | 0.02 | 11.72 | 0.17 | 0.84 | 0.04 |
| <b>Y100</b> | 1.22 | 0.05 | 11.84 | 0.48 | 0.90 | 0.06 |
| <b>E101</b> | 1.18 | 0.03 | 12.14 | 0.52 | 0.83 | 0.04 |
| <b>T102</b> | 1.26 | 0.02 | 12.12 | 0.46 | 0.87 | 0.05 |
| <b>E103</b> | 1.41 | 0.03 | 11.65 | 0.44 | 0.74 | 0.04 |
| <b>D104</b> | 1.29 | 0.04 | 10.89 | 0.20 | 0.73 | 0.04 |
| <b>G105</b> | 1.24 | 0.03 | 11.97 | 0.36 | 0.74 | 0.04 |
| <b>Q106</b> | 1.20 | 0.03 | 12.72 | 0.28 | 0.75 | 0.04 |
| <b>V107</b> | 1.22 | 0.02 | 10.87 | 0.26 | 0.78 | 0.04 |
| <b>F108</b> | 1.26 | 0.02 | 12.02 | 0.36 | 0.92 | 0.05 |
| <b>T109</b> | 1.23 | 0.03 | 11.95 | 0.52 | 0.87 | 0.05 |
| <b>D110</b> | 1.28 | 0.03 | 12.10 | 0.37 | 0.90 | 0.04 |
| <b>V111</b> | 1.23 | 0.02 | 13.14 | 0.44 | 0.86 | 0.04 |
| <b>I112</b> |      |      |       |      |      |      |
| <b>A113</b> | 1.21 | 0.04 | 12.60 | 0.62 | 0.89 | 0.06 |
| <b>Y114</b> | 1.18 | 0.02 | 13.39 | 0.19 | 0.79 | 0.03 |
| <b>S115</b> | 1.19 | 0.03 | 13.52 | 0.59 | 0.85 | 0.05 |
| <b>D116</b> | 1.20 | 0.03 | 13.03 | 0.57 | 0.80 | 0.05 |
| <b>D117</b> | 1.51 | 0.06 | 17.68 | 0.76 | 0.76 | 0.07 |
| <b>N118</b> | 1.34 | 0.03 | 11.79 | 0.23 | 0.75 | 0.06 |
| <b>C119</b> | 1.25 | 0.02 | 25.85 | 0.84 | 0.83 | 0.05 |
| <b>D120</b> | 1.16 | 0.04 | 20.24 | 0.92 | 0.93 | 0.06 |
| <b>V121</b> | 1.14 | 0.02 | 12.85 | 0.29 | 0.89 | 0.05 |
| <b>I122</b> | 1.19 | 0.03 | 13.37 | 0.78 | 0.85 | 0.05 |
| <b>Y123</b> | 1.29 | 0.04 | 12.73 | 0.93 | 0.83 | 0.05 |
| <b>V124</b> | 1.27 | 0.03 | 12.43 | 0.50 | 0.79 | 0.05 |

|                |             |             |              |             |             |             |
|----------------|-------------|-------------|--------------|-------------|-------------|-------------|
| <b>G126</b>    | 1.24        | 0.02        | 11.31        | 0.47        | 0.71        | 0.05        |
| <b>T127</b>    | 1.28        | 0.03        | 11.62        | 0.35        | 0.78        | 0.05        |
| <b>D128</b>    | 1.36        | 0.04        | 11.99        | 0.37        | 0.86        | 0.05        |
| <b>G129</b>    | 1.25        | 0.05        | 12.49        | 0.25        | 0.70        | 0.04        |
| <b>N130</b>    | 1.21        | 0.03        | 12.90        | 0.39        | 0.77        | 0.04        |
| <b>E132</b>    | 1.18        | 0.04        | 11.35        | 0.17        | 0.76        | 0.04        |
| <b>G133</b>    | 1.31        | 0.04        | 12.49        | 0.29        | 0.88        | 0.04        |
| <b>Y134</b>    | 1.16        | 0.05        | 12.75        | 0.46        | 0.91        | 0.05        |
| <b>E135</b>    | 1.13        | 0.03        | 12.77        | 0.36        | 0.79        | 0.05        |
| <b>L136</b>    | 1.20        | 0.03        | 12.76        | 0.56        | 0.84        | 0.04        |
| <b>W137</b>    | 1.17        | 0.03        | 12.95        | 0.28        | 0.86        | 0.05        |
| <b>T138</b>    | 1.19        | 0.03        | 11.93        | 0.34        | 0.82        | 0.04        |
| <b>T139</b>    | 1.21        | 0.03        | 15.72        | 0.51        | 0.78        | 0.05        |
| <b>D140</b>    | 1.25        | 0.03        | 12.39        | 0.31        | 0.71        | 0.04        |
| <b>Y141</b>    | 1.11        | 0.03        | 11.20        | 0.42        | 0.73        | 0.04        |
| <b>D142</b>    | 1.26        | 0.03        | 12.69        | 0.40        | 0.76        | 0.04        |
| <b>N143</b>    | 1.07        | 0.01        | 9.89         | 0.12        | 0.68        | 0.03        |
| <b>I144</b>    | 1.22        | 0.02        | 11.15        | 0.32        | 0.72        | 0.03        |
| <b>A146</b>    | 1.44        | 0.07        | 13.49        | 0.13        | 0.82        | 0.04        |
| <b>C148</b>    | 1.31        | 0.03        | 22.55        | 0.73        | 0.87        | 0.06        |
| <b>L149</b>    | 1.38        | 0.03        | 16.04        | 0.67        | 0.87        | 0.05        |
| <b>N150</b>    |             |             |              |             |             |             |
| <b>K151</b>    | 1.24        | 0.03        | 13.06        | 0.14        | 0.88        | 0.05        |
| <b>F152</b>    | 1.26        | 0.04        | 12.98        | 0.47        | 0.84        | 0.06        |
| <b>N153</b>    | 1.33        | 0.03        | 12.14        | 0.20        | 0.85        | 0.04        |
| <b>E154</b>    | 1.24        | 0.03        | 12.32        | 0.28        | 0.83        | 0.04        |
| <b>Y155</b>    | 1.28        | 0.03        | 12.33        | 0.23        | 0.88        | 0.04        |
| <b>A156</b>    | 1.29        | 0.02        | 12.29        | 0.27        | 0.79        | 0.03        |
| <b>V157</b>    | 1.10        | 0.02        | 11.80        | 0.24        | 0.81        | 0.03        |
| <b>E160</b>    | 1.24        | 0.09        | 11.18        | 0.51        | 0.74        | 0.06        |
| <b>T161</b>    | 1.13        | 0.02        | 9.08         | 0.18        | 0.64        | 0.03        |
| <b>R162</b>    | 1.32        | 0.05        | 13.39        | 0.34        | 0.84        | 0.05        |
| <b>D163</b>    | 1.22        | 0.03        | 12.41        | 0.31        | 0.86        | 0.04        |
| <b>V164</b>    | 1.23        | 0.03        | 11.53        | 0.46        | 0.82        | 0.06        |
| <b>F165</b>    |             |             |              |             |             |             |
| <b>T166</b>    | 1.17        | 0.04        | 11.67        | 0.40        | 0.81        | 0.04        |
| <b>S167</b>    | 1.24        | 0.14        | 13.65        | 1.04        | 0.67        | 0.06        |
| <b>A168</b>    | 1.42        | 0.08        | 13.69        | 0.42        | 0.92        | 0.05        |
| <b>C169</b>    |             |             |              |             |             |             |
| <b>L170</b>    | 1.21        | 0.02        | 10.42        | 0.17        | 0.68        | 0.03        |
| <b>E171</b>    | 1.41        | 0.01        | 5.67         | 0.06        | 0.34        | 0.02        |
| <b>Average</b> | <b>1.25</b> | <b>0.07</b> | <b>12.44</b> | <b>1.98</b> | <b>0.80</b> | <b>0.07</b> |



**Table s6.**  $^{15}\text{N}$  amide model-free parameters for *apo* rRaHBP2(D24R) calculated from NMR relaxation data acquired at 298 K.

| Residue | m | $S^2$ | error | $S_f^2$ | error | $S_s^2$ | error | $\tau_e$ (ps) | error  | $\tau_s$ (ps) | error   | $R_{ex}$<br>(1/s)<br>500<br>MHz | error | Chi <sup>2</sup> |
|---------|---|-------|-------|---------|-------|---------|-------|---------------|--------|---------------|---------|---------------------------------|-------|------------------|
| D4      | 3 | 0.80  | 0.03  |         |       |         |       |               |        |               |         | 1.44                            | 0.35  | 3.52             |
| W5      | 3 | 0.79  | 0.02  |         |       |         |       |               |        |               |         | 0.38                            | 0.24  | 4.26             |
| A6      | 1 | 0.87  | 0.01  |         |       |         |       |               |        |               |         |                                 |       | 5.95             |
| D7      | 4 | 0.62  | 0.01  |         |       |         |       | 10.82         | 3.18   |               |         | 0.85                            | 0.16  | 21.83            |
| E8      | 3 | 0.80  | 0.01  |         |       |         |       |               |        |               |         | 0.36                            | 0.18  | 25.82            |
| A9      | 1 | 0.88  | 0.00  |         |       |         |       |               |        |               |         |                                 |       | 37.05            |
| A10     | 3 | 0.80  | 0.01  |         |       |         |       |               |        |               |         | 0.27                            | 0.16  | 7.32             |
| N11     | 4 | 0.80  | 0.02  |         |       |         |       | 17.69         | 9.04   |               |         | 0.59                            | 0.28  | 8.65             |
| G12     | 3 | 0.85  | 0.02  |         |       |         |       |               |        |               |         | 0.87                            | 0.26  | 6.17             |
| A13     | 1 | 0.96  | 0.03  |         |       |         |       |               |        |               |         |                                 |       | 2.86             |
| H14     |   |       |       |         |       |         |       |               |        |               |         |                                 |       |                  |
| Q15     | 3 | 0.80  | 0.01  |         |       |         |       |               |        |               |         | 1.34                            | 0.23  | 4.90             |
| D16     | 1 | 0.84  | 0.01  |         |       |         |       |               |        |               |         |                                 |       | 12.06            |
| A17     | 3 | 0.82  | 0.01  |         |       |         |       |               |        |               |         | 0.94                            | 0.22  | 13.17            |
| W19     | 3 | 0.82  | 0.01  |         |       |         |       |               |        |               |         | 1.07                            | 0.18  | 9.82             |
| S20     | 3 | 0.81  | 0.01  |         |       |         |       |               |        |               |         | 1.40                            | 0.21  | 22.26            |
| L21     | 3 | 0.89  | 0.02  |         |       |         |       |               |        |               |         | 0.88                            | 0.36  | 4.15             |
| K22     | 3 | 0.83  | 0.01  |         |       |         |       |               |        |               |         | 1.25                            | 0.15  | 7.27             |
| A23     | 1 | 0.89  | 0.01  |         |       |         |       |               |        |               |         |                                 |       | 12.86            |
| R24     | 4 | 0.83  | 0.02  |         |       |         |       | 26.33         | 12.52  |               |         | 1.11                            | 0.22  | 3.87             |
| V25     | 3 | 0.84  | 0.01  |         |       |         |       |               |        |               |         | 1.77                            | 0.21  | 6.08             |
| E26     | 4 | 0.75  | 0.01  |         |       |         |       | 28.58         | 6.45   |               |         | 0.51                            | 0.17  | 11.15            |
| N27     | 4 | 0.77  | 0.01  |         |       |         |       | 27.39         | 7.24   |               |         | 0.55                            | 0.15  | 22.19            |
| V28     | 5 | 0.72  | 0.01  | 0.77    | 0.01  | 0.94    | 0.01  |               |        | 1118.65       | 745.451 |                                 |       | 26.88            |
| Y29     | 1 | 0.84  | 0.01  |         |       |         |       |               |        |               |         |                                 |       | 5.35             |
| Y30     | 1 | 0.88  | 0.02  |         |       |         |       |               |        |               |         |                                 |       | 2.05             |
| M31     | 1 | 0.88  | 0.01  |         |       |         |       |               |        |               |         |                                 |       | 2.08             |
| V32     | 3 | 0.81  | 0.02  |         |       |         |       |               |        |               |         | 3.68                            | 0.69  | 7.36             |
| K33     | 3 | 0.82  | 0.01  |         |       |         |       |               |        |               |         | 1.15                            | 0.22  | 4.68             |
| A34     | 3 | 0.85  | 0.01  |         |       |         |       |               |        |               |         | 0.53                            | 0.15  | 13.60            |
| T35     | 1 | 0.83  | 0.02  |         |       |         |       |               |        |               |         |                                 |       | 6.85             |
| Y36     | 1 | 0.94  | 0.02  |         |       |         |       |               |        |               |         |                                 |       | 4.47             |
| K37     | 1 | 0.91  | 0.02  |         |       |         |       |               |        |               |         |                                 |       | 8.72             |
| N38     | 4 | 0.65  | 0.08  |         |       |         |       | 73.85         | 66.82  |               |         | 2.63                            | 1.37  | 1.08             |
| D39     | 4 | 0.84  | 0.03  |         |       |         |       | 34.84         | 17.08  |               |         | 1.79                            | 0.42  | 4.91             |
| N44     | 3 | 0.88  | 0.02  |         |       |         |       |               |        |               |         | 0.77                            | 0.47  | 1.96             |
| D45     | 1 | 0.86  | 0.01  |         |       |         |       |               |        |               |         |                                 |       | 9.71             |
| F46     | 3 | 0.82  | 0.01  |         |       |         |       |               |        |               |         | 0.44                            | 0.15  | 19.52            |
| T47     | 4 | 0.84  | 0.02  |         |       |         |       | 26.53         | 16.14  |               |         | 0.70                            | 0.39  | 0.90             |
| V49     | 1 | 0.81  | 0.01  |         |       |         |       |               |        |               |         |                                 |       | 1.66             |
| G50     |   |       |       |         |       |         |       |               |        |               |         |                                 |       |                  |
| V51     | 3 | 0.90  | 0.02  |         |       |         |       |               |        |               |         | 1.20                            | 0.35  | 5.30             |
| M52     | 4 | 0.87  | 0.02  |         |       |         |       | 37.77         | 19.75  |               |         | 0.46                            | 0.21  | 4.67             |
| A53     | 4 | 0.81  | 0.06  |         |       |         |       | 75.41         | 131.42 |               |         | 1.95                            | 0.88  | 1.69             |
| N54     | 5 | 0.76  | 0.01  | 0.85    | 0.01  | 0.89    | 0.02  |               |        | 1081.44       | 287.88  |                                 |       | 11.61            |
| D56     | 5 | 0.76  | 0.01  | 0.81    | 0.01  | 0.93    | 0.01  |               |        | 1326.39       | 1756.68 |                                 |       | 4.85             |
| V57     | 1 | 0.84  | 0.01  |         |       |         |       |               |        |               |         |                                 |       | 8.51             |
| E58     | 1 | 0.90  | 0.02  |         |       |         |       |               |        |               |         |                                 |       | 5.66             |
| D59     | 4 | 0.80  | 0.01  |         |       |         |       | 12.73         | 5.55   |               |         | 0.42                            | 0.10  | 20.41            |
| E60     | 4 | 0.77  | 0.01  |         |       |         |       | 13.56         | 6.18   |               |         | 0.33                            | 0.12  | 17.87            |
| K61     | 2 | 0.84  | 0.01  |         |       |         |       | 23.40         | 11.74  |               |         |                                 |       | 8.12             |
| S62     | 3 | 0.85  | 0.01  |         |       |         |       |               |        |               |         | 0.34                            | 0.17  | 6.59             |
| I63     | 5 | 0.82  | 0.03  | 0.86    | 0.04  | 0.95    | 0.04  |               |        | 948.383       | 5077.24 |                                 |       | 9.31             |

|             |   |      |      |      |      |      |      |  |        |        |         |         |  |  |  |  |      |      |      |       |
|-------------|---|------|------|------|------|------|------|--|--------|--------|---------|---------|--|--|--|--|------|------|------|-------|
| <b>Q64</b>  |   |      |      |      |      |      |      |  |        |        |         |         |  |  |  |  |      |      |      |       |
| <b>A65</b>  | 2 | 0.82 | 0.01 |      |      |      |      |  | 26.87  | 9.59   |         |         |  |  |  |  |      |      |      | 7.73  |
| <b>E66</b>  | 2 | 0.85 | 0.01 |      |      |      |      |  | 47.46  | 20.58  |         |         |  |  |  |  |      |      |      | 28.00 |
| <b>F67</b>  | 1 | 0.85 | 0.02 |      |      |      |      |  |        |        |         |         |  |  |  |  |      |      |      | 9.33  |
| <b>L68</b>  |   |      |      |      |      |      |      |  |        |        |         |         |  |  |  |  |      |      |      |       |
| <b>F69</b>  |   |      |      |      |      |      |      |  |        |        |         |         |  |  |  |  |      |      |      |       |
| <b>M70</b>  | 3 | 0.82 | 0.02 |      |      |      |      |  |        |        |         |         |  |  |  |  | 0.74 | 0.28 |      | 3.80  |
| <b>N71</b>  |   |      |      |      |      |      |      |  |        |        |         |         |  |  |  |  |      |      |      |       |
| <b>N72</b>  | 4 | 0.83 | 0.02 |      |      |      |      |  | 41.08  | 15.04  |         |         |  |  |  |  | 0.83 | 0.32 |      | 9.29  |
| <b>A73</b>  |   |      |      |      |      |      |      |  |        |        |         |         |  |  |  |  |      |      |      |       |
| <b>D74</b>  | 2 | 0.80 | 0.01 |      |      |      |      |  | 14.30  | 7.71   |         |         |  |  |  |  |      |      |      | 15.00 |
| <b>T75</b>  | 2 | 0.84 | 0.02 |      |      |      |      |  | 43.73  | 21.70  |         |         |  |  |  |  |      |      |      | 12.54 |
| <b>N76</b>  |   |      |      |      |      |      |      |  |        |        |         |         |  |  |  |  |      |      |      |       |
| <b>M77</b>  | 2 | 0.81 | 0.01 |      |      |      |      |  | 15.60  | 7.44   |         |         |  |  |  |  |      |      |      | 15.56 |
| <b>Q78</b>  | 1 | 0.86 | 0.02 |      |      |      |      |  |        |        |         |         |  |  |  |  |      |      |      | 1.81  |
| <b>F79</b>  |   |      |      |      |      |      |      |  |        |        |         |         |  |  |  |  |      |      |      |       |
| <b>A80</b>  | 1 | 0.83 | 0.01 |      |      |      |      |  |        |        |         |         |  |  |  |  |      |      |      | 8.62  |
| <b>T81</b>  | 1 | 0.84 | 0.01 |      |      |      |      |  |        |        |         |         |  |  |  |  |      |      |      | 9.84  |
| <b>E82</b>  | 1 | 0.87 | 0.02 |      |      |      |      |  |        |        |         |         |  |  |  |  |      |      |      | 5.86  |
| <b>K83</b>  | 4 | 0.67 | 0.05 |      |      |      |      |  | 55.91  | 22.22  |         |         |  |  |  |  | 1.92 | 0.78 |      | 1.41  |
| <b>V84</b>  | 3 | 0.88 | 0.04 |      |      |      |      |  |        |        |         |         |  |  |  |  | 2.56 | 0.73 |      | 1.20  |
| <b>T85</b>  | 1 | 0.93 | 0.01 |      |      |      |      |  |        |        |         |         |  |  |  |  |      |      |      | 12.59 |
| <b>A86</b>  | 5 | 0.85 | 0.02 | 0.89 | 0.03 | 0.95 | 0.03 |  |        |        | 1053.44 | 4683.41 |  |  |  |  |      |      |      | 17.97 |
| <b>V87</b>  |   |      |      |      |      |      |      |  |        |        |         |         |  |  |  |  |      |      |      |       |
| <b>K88</b>  | 5 | 0.80 | 0.03 | 0.85 | 0.01 | 0.94 | 0.03 |  |        |        | 2140.27 | 6002.84 |  |  |  |  |      |      |      | 10.78 |
| <b>M89</b>  | 1 | 0.82 | 0.01 |      |      |      |      |  |        |        |         |         |  |  |  |  |      |      |      | 1.53  |
| <b>Y90</b>  |   |      |      |      |      |      |      |  |        |        |         |         |  |  |  |  |      |      |      |       |
| <b>G91</b>  | 1 | 0.95 | 0.02 |      |      |      |      |  |        |        |         |         |  |  |  |  |      |      |      | 5.68  |
| <b>Y92</b>  | 3 | 0.84 | 0.02 |      |      |      |      |  |        |        |         |         |  |  |  |  |      | 1.19 | 0.27 | 10.31 |
| <b>N93</b>  | 3 | 0.78 | 0.02 |      |      |      |      |  |        |        |         |         |  |  |  |  | 0.66 | 0.31 |      | 5.48  |
| <b>R94</b>  | 1 | 0.82 | 0.01 |      |      |      |      |  |        |        |         |         |  |  |  |  |      |      |      | 17.07 |
| <b>E95</b>  | 3 | 0.83 | 0.01 |      |      |      |      |  |        |        |         |         |  |  |  |  |      | 0.29 | 0.15 | 6.56  |
| <b>N96</b>  | 1 | 0.86 | 0.01 |      |      |      |      |  |        |        |         |         |  |  |  |  |      |      |      | 1.22  |
| <b>A97</b>  |   |      |      |      |      |      |      |  |        |        |         |         |  |  |  |  |      |      |      |       |
| <b>F98</b>  |   |      |      |      |      |      |      |  |        |        |         |         |  |  |  |  |      |      |      |       |
| <b>R99</b>  | 1 | 0.87 | 0.01 |      |      |      |      |  |        |        |         |         |  |  |  |  |      |      |      | 16.97 |
| <b>E101</b> | 4 | 0.87 | 0.02 |      |      |      |      |  | 50.82  | 26.94  |         |         |  |  |  |  | 0.66 | 0.35 |      | 3.25  |
| <b>T102</b> | 4 | 0.84 | 0.02 |      |      |      |      |  | 41.68  | 13.00  |         |         |  |  |  |  | 0.92 | 0.35 |      | 1.90  |
| <b>E103</b> | 2 | 0.86 | 0.02 |      |      |      |      |  | 76.13  | 90.58  |         |         |  |  |  |  |      |      |      | 12.28 |
| <b>D104</b> |   |      |      |      |      |      |      |  |        |        |         |         |  |  |  |  |      |      |      |       |
| <b>G105</b> | 2 | 0.79 | 0.02 |      |      |      |      |  | 31.92  | 19.59  |         |         |  |  |  |  |      |      |      | 8.10  |
| <b>Q106</b> | 4 | 0.76 | 0.02 |      |      |      |      |  | 40.01  | 12.06  |         |         |  |  |  |  |      | 0.63 | 0.31 | 15.19 |
| <b>V107</b> | 5 | 0.76 | 0.01 | 0.8  | 0.03 | 0.94 | 0.03 |  |        |        | 1053.94 | 3044.5  |  |  |  |  |      |      |      | 17.93 |
| <b>F108</b> |   |      |      |      |      |      |      |  |        |        |         |         |  |  |  |  |      |      |      |       |
| <b>V111</b> | 3 | 0.82 | 0.02 |      |      |      |      |  |        |        |         |         |  |  |  |  |      | 6.63 | 0.40 | 6.65  |
| <b>I112</b> | 3 | 0.85 | 0.02 |      |      |      |      |  |        |        |         |         |  |  |  |  |      | 0.49 | 0.30 | 1.90  |
| <b>A113</b> | 3 | 0.83 | 0.01 |      |      |      |      |  |        |        |         |         |  |  |  |  |      | 1.34 | 0.27 | 6.23  |
| <b>Y114</b> |   |      |      |      |      |      |      |  |        |        |         |         |  |  |  |  |      |      |      |       |
| <b>S115</b> | 3 | 0.79 | 0.01 |      |      |      |      |  |        |        |         |         |  |  |  |  |      | 0.85 | 0.19 | 14.30 |
| <b>D116</b> | 4 | 0.79 | 0.01 |      |      |      |      |  | 14.93  | 8.27   |         |         |  |  |  |  |      | 0.91 | 0.16 | 15.98 |
| <b>D117</b> | 4 | 0.89 | 0.04 |      |      |      |      |  | 84.12  | 266.33 |         |         |  |  |  |  |      | 2.08 | 0.52 | 2.97  |
| <b>N118</b> | 4 | 0.82 | 0.02 |      |      |      |      |  | 41.60  | 12.98  |         |         |  |  |  |  |      | 0.38 | 0.23 | 4.28  |
| <b>C119</b> | 3 | 0.88 | 0.02 |      |      |      |      |  |        |        |         |         |  |  |  |  |      | 7.71 | 0.72 | 3.62  |
| <b>D120</b> | 3 | 0.82 | 0.10 |      |      |      |      |  |        |        |         |         |  |  |  |  |      | 8.33 | 1.92 | 3.43  |
| <b>V121</b> | 3 | 0.81 | 0.01 |      |      |      |      |  |        |        |         |         |  |  |  |  |      | 1.39 | 0.26 | 3.67  |
| <b>I122</b> | 3 | 0.80 | 0.02 |      |      |      |      |  |        |        |         |         |  |  |  |  |      | 1.84 | 0.37 | 4.63  |
| <b>Y123</b> | 3 | 0.84 | 0.02 |      |      |      |      |  |        |        |         |         |  |  |  |  |      | 0.92 | 0.38 | 5.05  |
| <b>V124</b> | 4 | 0.88 | 0.02 |      |      |      |      |  | 44.27  | 23.86  |         |         |  |  |  |  |      | 1.34 | 0.38 | 7.49  |
| <b>G126</b> | 3 | 0.86 | 0.04 |      |      |      |      |  |        |        |         |         |  |  |  |  |      | 1.87 | 0.70 | 5.84  |
| <b>T127</b> | 4 | 0.83 | 0.03 |      |      |      |      |  | 109.04 | 46.90  |         |         |  |  |  |  |      | 2.24 | 0.43 | 1.79  |

|             |   |      |      |      |      |      |      |  |        |        |  |         |         |      |  |  |  |        |
|-------------|---|------|------|------|------|------|------|--|--------|--------|--|---------|---------|------|--|--|--|--------|
| <b>G129</b> | 2 | 0.79 | 0.02 |      |      |      |      |  | 53.20  | 12.01  |  |         |         |      |  |  |  | 10.71  |
| <b>E131</b> |   |      |      |      |      |      |      |  |        |        |  |         |         |      |  |  |  |        |
| <b>G133</b> | 4 | 0.83 | 0.03 |      |      |      |      |  | 83.90  | 28.30  |  |         | 3.49    | 0.80 |  |  |  | 5.63   |
| <b>Y134</b> | 4 | 0.82 | 0.01 |      |      |      |      |  | 14.81  | 8.05   |  |         | 0.55    | 0.20 |  |  |  | 8.97   |
| <b>E135</b> | 3 | 0.78 | 0.02 |      |      |      |      |  |        |        |  |         | 1.47    | 0.30 |  |  |  | 6.62   |
| <b>L136</b> | 3 | 0.80 | 0.01 |      |      |      |      |  |        |        |  |         | 1.46    | 0.26 |  |  |  | 11.30  |
| <b>W137</b> | 3 | 0.83 | 0.02 |      |      |      |      |  |        |        |  |         | 0.94    | 0.30 |  |  |  | 3.94   |
| <b>T138</b> | 1 | 0.86 | 0.01 |      |      |      |      |  |        |        |  |         |         |      |  |  |  | 22.95  |
| <b>T139</b> | 4 | 0.81 | 0.02 |      |      |      |      |  | 39.14  | 13.82  |  |         | 2.31    | 0.44 |  |  |  | 3.07   |
| <b>D140</b> | 2 | 0.82 | 0.01 |      |      |      |      |  | 45.06  | 11.27  |  |         |         |      |  |  |  | 10.42  |
| <b>Y141</b> | 4 | 0.76 | 0.02 |      |      |      |      |  | 19.49  | 6.02   |  |         | 0.98    | 0.29 |  |  |  | 1.16   |
| <b>D142</b> | 1 | 0.84 | 0.01 |      |      |      |      |  |        |        |  |         |         |      |  |  |  | 12.52  |
| <b>N143</b> | 2 | 0.68 | 0.00 |      |      |      |      |  | 21.94  | 2.86   |  |         |         |      |  |  |  | 26.64  |
| <b>I144</b> | 5 | 0.74 | 0.01 | 0.79 | 0.01 | 0.93 | 0.01 |  |        |        |  | 1042.66 | 1737.98 |      |  |  |  | 8.25   |
| <b>A146</b> | 1 | 0.89 | 0.01 |      |      |      |      |  |        |        |  |         |         |      |  |  |  | 12.95  |
| <b>N148</b> | 4 | 0.84 | 0.02 |      |      |      |      |  | 32.06  | 13.49  |  |         | 7.06    | 0.39 |  |  |  | 2.85   |
| <b>C149</b> | 3 | 0.88 | 0.02 |      |      |      |      |  |        |        |  |         | 2.40    | 0.28 |  |  |  | 3.79   |
| <b>N150</b> | 1 | 0.87 | 0.01 |      |      |      |      |  |        |        |  |         |         |      |  |  |  | 9.58   |
| <b>K151</b> | 1 | 0.86 | 0.01 |      |      |      |      |  |        |        |  |         |         |      |  |  |  | 6.53   |
| <b>F152</b> | 3 | 0.85 | 0.01 |      |      |      |      |  |        |        |  |         | 0.41    | 0.18 |  |  |  | 13.60  |
| <b>N153</b> | 1 | 0.89 | 0.01 |      |      |      |      |  |        |        |  |         |         |      |  |  |  | 5.12   |
| <b>E154</b> | 1 | 0.85 | 0.01 |      |      |      |      |  |        |        |  |         |         |      |  |  |  | 5.63   |
| <b>Y155</b> |   |      |      |      |      |      |      |  |        |        |  |         |         |      |  |  |  |        |
| <b>A156</b> |   |      |      |      |      |      |      |  |        |        |  |         |         |      |  |  |  |        |
| <b>V157</b> | 3 | 0.75 | 0.01 |      |      |      |      |  |        |        |  |         | 0.65    | 0.12 |  |  |  | 16.44  |
| <b>R159</b> | 2 | 0.80 | 0.01 |      |      |      |      |  | 12.21  | 6.43   |  |         |         |      |  |  |  | 31.30  |
| <b>E160</b> | 2 | 0.75 | 0.01 |      |      |      |      |  | 25.67  | 8.29   |  |         |         |      |  |  |  | 1.81   |
| <b>R162</b> | 1 | 0.88 | 0.01 |      |      |      |      |  |        |        |  |         |         |      |  |  |  | 6.62   |
| <b>D163</b> | 3 | 0.81 | 0.02 |      |      |      |      |  |        |        |  |         | 0.68    | 0.26 |  |  |  | 8.18   |
| <b>V164</b> | 3 | 0.75 | 0.01 |      |      |      |      |  |        |        |  |         | 0.94    | 0.36 |  |  |  | 15.91  |
| <b>F165</b> | 2 | 0.87 | 0.03 |      |      |      |      |  | 119.51 | 212.22 |  |         |         |      |  |  |  | 0.46   |
| <b>T166</b> | 4 | 0.75 | 0.02 |      |      |      |      |  | 23.13  | 7.15   |  |         | 0.44    | 0.25 |  |  |  | 3.36   |
| <b>S167</b> | 1 | 0.86 | 0.02 |      |      |      |      |  |        |        |  |         |         |      |  |  |  | 4.72   |
| <b>A168</b> | 4 | 0.85 | 0.03 |      |      |      |      |  | 19.02  | 11.64  |  |         | 0.62    | 0.35 |  |  |  | 17.28  |
| <b>C169</b> |   |      |      |      |      |      |      |  |        |        |  |         |         |      |  |  |  |        |
| <b>L170</b> | 2 | 0.77 | 0.01 |      |      |      |      |  | 51.23  | 6.36   |  |         |         |      |  |  |  | 3.75   |
| <b>E171</b> | 5 | 0.29 | 0.00 | 0.69 | 0.01 | 0.42 | 0.00 |  |        |        |  | 1449.54 | 33.74   |      |  |  |  | 143.40 |

**Table s7.**  $^{15}\text{N}$  amide model-free parameters for rRaHBP2(D24R) in complex with histamine calculated from NMR relaxation data acquired at 298 K.

| Residue | m | $S^2$ | error | $S^2_f$ | error | $S^2_s$ | error | $\tau_e$ (ps) | error | $\tau_s$ (ps) | error   | $R_{ex}$<br>(1/s)<br>500<br>MHz | error | Chi <sup>2</sup> |
|---------|---|-------|-------|---------|-------|---------|-------|---------------|-------|---------------|---------|---------------------------------|-------|------------------|
| D4      | 3 | 0.84  | 0.04  |         |       |         |       |               |       |               |         | 1.40                            | 0.60  | 4.83             |
| W5      | 3 | 0.76  | 0.02  |         |       |         |       |               |       |               |         | 1.31                            | 0.31  | 2.67             |
| A6      | 1 | 0.88  | 0.01  |         |       |         |       |               |       |               |         |                                 |       | 18.17            |
| D7      | 4 | 0.62  | 0.02  |         |       |         |       | 8.19          | 3.56  |               |         | 0.88                            | 0.18  | 4.86             |
| E8      | 1 | 0.86  | 0.01  |         |       |         |       |               |       |               |         |                                 |       | 7.28             |
| A9      | 1 | 0.90  | 0.01  |         |       |         |       |               |       |               |         |                                 |       | 9.28             |
| A10     | 3 | 0.81  | 0.01  |         |       |         |       |               |       |               |         | 0.20                            | 0.14  | 4.81             |
| N11     | 1 | 0.84  | 0.01  |         |       |         |       |               |       |               |         |                                 |       | 6.43             |
| G12     | 4 | 0.82  | 0.02  |         |       |         |       | 26.11         | 8.46  |               |         | 1.29                            | 0.29  | 3.13             |
| A13     | 3 | 0.96  | 0.03  |         |       |         |       |               |       |               |         | 0.85                            | 0.35  | 4.43             |
| H14     | 3 | 0.80  | 0.02  |         |       |         |       |               |       |               |         | 0.79                            | 0.30  | 5.01             |
| D16     | 4 | 0.82  | 0.01  |         |       |         |       | 13.40         | 8.04  |               |         | 0.54                            | 0.15  | 10.21            |
| A17     | 3 | 0.86  | 0.01  |         |       |         |       |               |       |               |         | 0.50                            | 0.14  | 28.03            |
| W18     | 3 | 0.83  | 0.01  |         |       |         |       |               |       |               |         | 1.31                            | 0.20  | 17.43            |
| K19     | 3 | 0.82  | 0.01  |         |       |         |       |               |       |               |         | 1.21                            | 0.14  | 9.06             |
| S20     | 4 | 0.81  | 0.01  |         |       |         |       | 13.17         | 7.40  |               |         | 1.12                            | 0.13  | 11.16            |
| L21     | 3 | 0.84  | 0.01  |         |       |         |       |               |       |               |         | 1.76                            | 0.18  | 9.00             |
| K22     | 3 | 0.80  | 0.01  |         |       |         |       |               |       |               |         | 1.67                            | 0.13  | 11.42            |
| A23     | 3 | 0.85  | 0.01  |         |       |         |       |               |       |               |         | 0.90                            | 0.16  | 8.67             |
| R24     |   |       |       |         |       |         |       |               |       |               |         |                                 |       |                  |
| N27     | 4 | 0.75  | 0.01  |         |       |         |       | 21.30         | 6.15  |               |         | 0.67                            | 0.17  | 8.23             |
| Y29     | 1 | 0.86  | 0.01  |         |       |         |       |               |       |               |         |                                 |       | 9.31             |
| Y30     | 4 | 0.82  | 0.02  |         |       |         |       | 20.15         | 11.83 |               |         | 0.72                            | 0.26  | 7.23             |
| M31     |   |       |       |         |       |         |       |               |       |               |         |                                 |       |                  |
| V32     | 3 | 0.79  | 0.02  |         |       |         |       |               |       |               |         | 3.15                            | 0.32  | 8.24             |
| K33     | 3 | 0.84  | 0.01  |         |       |         |       |               |       |               |         | 1.33                            | 0.14  | 5.39             |
| A34     | 4 | 0.80  | 0.01  |         |       |         |       | 13.16         | 6.99  |               |         | 1.37                            | 0.18  | 3.14             |
| T35     | 3 | 0.82  | 0.01  |         |       |         |       |               |       |               |         | 1.07                            | 0.21  | 3.30             |
| K37     | 1 | 0.87  | 0.01  |         |       |         |       |               |       |               |         |                                 |       | 24.40            |
| N38     | 3 | 0.81  | 0.01  |         |       |         |       |               |       |               |         | 1.31                            | 0.20  | 3.60             |
| D39     |   |       |       |         |       |         |       |               |       |               |         |                                 |       |                  |
| V41     | 3 | 0.84  | 0.02  |         |       |         |       |               |       |               |         | 0.65                            | 0.23  | 4.30             |
| W42     | 4 | 0.75  | 0.02  |         |       |         |       | 31.03         | 7.68  |               |         | 2.14                            | 0.32  | 2.36             |
| G43     | 3 | 0.86  | 0.01  |         |       |         |       |               |       |               |         | 1.32                            | 0.22  | 6.96             |
| N44     | 1 | 0.84  | 0.01  |         |       |         |       |               |       |               |         |                                 |       | 9.60             |
| D45     | 4 | 0.81  | 0.02  |         |       |         |       | 21.29         | 12.13 |               |         | 1.17                            | 0.23  | 1.11             |
| F46     | 3 | 0.81  | 0.01  |         |       |         |       |               |       |               |         | 0.62                            | 0.23  | 6.49             |
| T47     | 1 | 0.85  | 0.01  |         |       |         |       |               |       |               |         |                                 |       | 8.00             |
| C48     | 3 | 0.79  | 0.02  |         |       |         |       |               |       |               |         | 1.55                            | 0.24  | 59.78            |
| V49     | 3 | 0.78  | 0.01  |         |       |         |       |               |       |               |         | 0.65                            | 0.32  | 5.48             |
| G50     | 1 | 0.89  | 0.01  |         |       |         |       |               |       |               |         | 0.00                            | 0.00  | 6.87             |
| V51     | 3 | 0.86  | 0.02  |         |       |         |       |               |       |               |         | 0.36                            | 0.21  | 10.76            |
| M52     | 1 | 0.88  | 0.01  |         |       |         |       |               |       |               |         |                                 |       | 3.32             |
| A53     | 2 | 0.79  | 0.01  |         |       |         |       | 25.03         | 7.85  |               |         |                                 |       | 9.81             |
| N54     | 5 | 0.76  | 0.02  | 0.86    | 0.01  | 0.89    | 0.02  |               |       | 1559.29       | 1654.77 |                                 |       | 14.61            |
| D55     | 5 | 0.64  | 0.01  | 0.79    | 0.01  | 0.81    | 0.01  |               |       | 1372.31       | 146.24  |                                 |       | 18.83            |
| N57     | 1 | 0.83  | 0.01  |         |       |         |       |               |       |               |         |                                 |       | 6.72             |
| E58     | 3 | 0.83  | 0.02  |         |       |         |       |               |       |               |         | 1.04                            | 0.21  | 12.68            |
| D59     | 4 | 0.79  | 0.01  |         |       |         |       | 16.59         | 5.72  |               |         | 0.68                            | 0.12  | 17.46            |
| E60     | 3 | 0.74  | 0.01  |         |       |         |       |               |       |               |         | 1.08                            | 0.15  | 12.83            |
| K61     | 1 | 0.83  | 0.01  |         |       |         |       |               |       |               |         |                                 |       | 6.41             |
| S62     | 1 | 0.87  | 0.01  |         |       |         |       |               |       |               |         |                                 |       | 18.18            |
| I63     | 1 | 0.85  | 0.01  |         |       |         |       |               |       |               |         |                                 |       | 10.31            |

|             |   |      |      |      |      |      |      |        |        |         |         |      |      |       |
|-------------|---|------|------|------|------|------|------|--------|--------|---------|---------|------|------|-------|
| <b>Q64</b>  | 4 | 0.71 | 0.01 |      |      |      |      | 26.42  | 3.83   |         |         | 0.89 | 0.13 | 5.13  |
| <b>A65</b>  | 2 | 0.84 | 0.01 |      |      |      |      | 15.21  | 9.49   |         |         |      |      | 45.41 |
| <b>E66</b>  | 5 | 0.81 | 0.03 | 0.85 | 0.04 | 0.96 | 0.04 |        |        | 1506.76 | 6514.47 |      |      | 6.20  |
| <b>F67</b>  | 3 | 0.84 | 0.01 |      |      |      |      |        |        |         |         | 0.46 | 0.21 | 9.48  |
| <b>L68</b>  | 3 | 0.85 | 0.02 |      |      |      |      |        |        |         |         | 0.78 | 0.25 | 5.28  |
| <b>F69</b>  | 4 | 0.80 | 0.01 |      |      |      |      | 19.04  | 7.95   |         |         | 0.52 | 0.18 | 1.01  |
| <b>M70</b>  | 3 | 0.82 | 0.01 |      |      |      |      |        |        |         |         | 1.31 | 0.25 | 9.40  |
| <b>N71</b>  | 3 | 0.79 | 0.01 |      |      |      |      |        |        |         |         | 1.27 | 0.24 | 11.00 |
| <b>N72</b>  | 2 | 0.83 | 0.01 |      |      |      |      | 36.37  | 10.33  |         |         |      |      | 5.80  |
| <b>A73</b>  |   |      |      |      |      |      |      |        |        |         |         |      |      |       |
| <b>D74</b>  | 4 | 0.73 | 0.01 |      |      |      |      | 34.38  | 3.51   |         |         | 0.50 | 0.11 | 66.15 |
| <b>T75</b>  | 2 | 0.79 | 0.02 |      |      |      |      | 32.32  | 10.29  |         |         |      |      | 2.31  |
| <b>M77</b>  | 5 | 0.79 | 0.02 | 0.83 | 0.01 | 0.96 | 0.02 |        |        | 1578.33 | 5165.22 |      |      | 8.44  |
| <b>Q78</b>  | 1 | 0.84 | 0.01 |      |      |      |      |        |        |         |         |      |      | 7.69  |
| <b>F79</b>  | 1 | 0.82 | 0.01 |      |      |      |      |        |        |         |         |      |      | 9.76  |
| <b>A80</b>  | 5 | 0.80 | 0.02 | 0.82 | 0.02 | 0.97 | 0.03 |        |        | 4488.27 | 7651.16 |      |      | 4.70  |
| <b>T81</b>  | 1 | 0.79 | 0.01 |      |      |      |      |        |        |         |         |      |      | 12.17 |
| <b>E82</b>  | 1 | 0.85 | 0.01 |      |      |      |      |        |        |         |         |      |      | 9.77  |
| <b>K83</b>  | 3 | 0.82 | 0.01 |      |      |      |      |        |        |         |         | 0.45 | 0.22 | 7.30  |
| <b>V84</b>  | 1 | 0.85 | 0.01 |      |      |      |      |        |        |         |         |      |      | 19.34 |
| <b>T85</b>  |   |      |      |      |      |      |      |        |        |         |         |      |      |       |
| <b>A86</b>  | 1 | 0.84 | 0.01 |      |      |      |      |        |        |         |         |      |      | 30.00 |
| <b>K88</b>  | 1 | 0.85 | 0.01 |      |      |      |      |        |        |         |         |      |      | 4.50  |
| <b>M89</b>  | 1 | 0.79 | 0.01 |      |      |      |      |        |        |         |         |      |      | 17.98 |
| <b>G91</b>  | 1 | 0.95 | 0.02 |      |      |      |      |        |        |         |         |      |      | 1.40  |
| <b>Y92</b>  | 3 | 0.86 | 0.01 |      |      |      |      |        |        |         |         | 1.02 | 0.24 | 3.29  |
| <b>N93</b>  | 3 | 0.78 | 0.02 |      |      |      |      |        |        |         |         | 0.75 | 0.35 | 5.18  |
| <b>R94</b>  |   |      |      |      |      |      |      |        |        |         |         |      |      |       |
| <b>E95</b>  | 4 | 0.77 | 0.01 |      |      |      |      | 14.87  | 5.69   |         |         | 0.85 | 0.15 | 23.13 |
| <b>N96</b>  | 3 | 0.83 | 0.02 |      |      |      |      |        |        |         |         | 0.56 | 0.33 | 8.06  |
| <b>A97</b>  |   |      |      |      |      |      |      |        |        |         |         |      |      |       |
| <b>R99</b>  | 3 | 0.81 | 0.01 |      |      |      |      |        |        |         |         | 0.69 | 0.13 | 17.94 |
| <b>Y100</b> | 3 | 0.83 | 0.02 |      |      |      |      |        |        |         |         | 0.42 | 0.29 | 5.95  |
| <b>E101</b> | 1 | 0.84 | 0.01 |      |      |      |      |        |        |         |         |      |      | 27.69 |
| <b>T102</b> | 3 | 0.85 | 0.01 |      |      |      |      |        |        |         |         | 0.31 | 0.18 | 20.65 |
| <b>E103</b> | 2 | 0.88 | 0.01 |      |      |      |      | 33.49  | 15.56  |         |         |      |      | 2.83  |
| <b>D104</b> | 5 | 0.78 | 0.01 | 0.83 | 0.03 | 0.94 | 0.03 |        |        | 1004.56 | 1719.23 |      |      | 9.26  |
| <b>G105</b> | 2 | 0.79 | 0.01 |      |      |      |      | 31.07  | 7.81   |         |         |      |      | 25.37 |
| <b>Q106</b> | 4 | 0.80 | 0.01 |      |      |      |      | 24.58  | 8.39   |         |         | 0.98 | 0.18 | 21.26 |
| <b>V107</b> | 2 | 0.78 | 0.01 |      |      |      |      | 14.00  | 8.24   |         |         |      |      | 5.97  |
| <b>F108</b> | 3 | 0.83 | 0.01 |      |      |      |      |        |        |         |         | 0.44 | 0.21 | 11.91 |
| <b>T109</b> | 3 | 0.81 | 0.02 |      |      |      |      |        |        |         |         | 0.42 | 0.27 | 6.53  |
| <b>D110</b> | 1 | 0.84 | 0.01 |      |      |      |      |        |        |         |         |      |      | 14.12 |
| <b>V111</b> | 3 | 0.82 | 0.01 |      |      |      |      |        |        |         |         | 1.26 | 0.27 | 14.45 |
| <b>I112</b> |   |      |      |      |      |      |      |        |        |         |         |      |      |       |
| <b>A113</b> | 3 | 0.83 | 0.02 |      |      |      |      |        |        |         |         | 1.66 | 0.35 | 13.00 |
| <b>Y114</b> | 3 | 0.79 | 0.01 |      |      |      |      |        |        |         |         | 2.03 | 0.13 | 12.41 |
| <b>S115</b> | 3 | 0.79 | 0.01 |      |      |      |      |        |        |         |         | 1.73 | 0.25 | 7.63  |
| <b>D116</b> | 3 | 0.80 | 0.02 |      |      |      |      |        |        |         |         | 1.59 | 0.30 | 6.28  |
| <b>D117</b> | 4 | 0.91 | 0.03 |      |      |      |      | 146.03 | 199.93 |         |         | 2.25 | 0.37 | 17.03 |
| <b>N118</b> | 2 | 0.86 | 0.01 |      |      |      |      | 33.03  | 16.94  |         |         |      |      | 9.55  |
| <b>C119</b> | 3 | 0.81 | 0.01 |      |      |      |      |        |        |         |         | 8.66 | 0.46 | 20.94 |
| <b>D120</b> | 3 | 0.79 | 0.02 |      |      |      |      |        |        |         |         | 6.48 | 0.37 | 9.22  |
| <b>V121</b> | 3 | 0.77 | 0.01 |      |      |      |      |        |        |         |         | 1.79 | 0.19 | 29.53 |
| <b>I122</b> | 3 | 0.79 | 0.01 |      |      |      |      |        |        |         |         | 0.80 | 0.25 | 10.99 |
| <b>Y123</b> | 3 | 0.82 | 0.02 |      |      |      |      |        |        |         |         | 0.74 | 0.34 | 1.75  |
| <b>V124</b> | 3 | 0.83 | 0.02 |      |      |      |      |        |        |         |         | 0.84 | 0.31 | 2.09  |
| <b>G126</b> | 4 | 0.80 | 0.01 |      |      |      |      | 24.60  | 9.97   |         |         | 0.66 | 0.21 | 7.56  |
| <b>T127</b> | 5 | 0.79 | 0.01 | 0.85 | 0.05 | 0.94 | 0.05 |        |        | 672.87  | 1737.95 |      |      | 19.66 |
| <b>D128</b> | 5 | 0.84 | 0.03 | 0.88 | 0.03 | 0.95 | 0.03 |        |        | 1187.31 | 4014.00 |      |      | 16.56 |

|             |   |      |      |      |      |      |      |       |       |         |        |      |      |       |
|-------------|---|------|------|------|------|------|------|-------|-------|---------|--------|------|------|-------|
| <b>G129</b> | 4 | 0.78 | 0.02 |      |      |      |      | 27.99 | 6.55  |         |        | 0.85 | 0.23 | 25.78 |
| <b>N130</b> | 4 | 0.77 | 0.01 |      |      |      |      | 19.09 | 7.47  |         |        | 1.28 | 0.24 | 10.34 |
| <b>E132</b> | 4 | 0.78 | 0.01 |      |      |      |      | 19.03 | 8.03  |         |        | 0.44 | 0.16 | 16.75 |
| <b>G133</b> | 3 | 0.86 | 0.02 |      |      |      |      |       |       |         |        | 0.69 | 0.26 | 3.24  |
| <b>Y134</b> | 3 | 0.84 | 0.01 |      |      |      |      |       |       |         |        | 0.54 | 0.26 | 19.94 |
| <b>E135</b> | 3 | 0.75 | 0.01 |      |      |      |      |       |       |         |        | 1.53 | 0.21 | 10.50 |
| <b>L136</b> | 3 | 0.81 | 0.01 |      |      |      |      |       |       |         |        | 1.55 | 0.26 | 6.81  |
| <b>W137</b> | 3 | 0.79 | 0.01 |      |      |      |      |       |       |         |        | 1.91 | 0.20 | 13.31 |
| <b>T138</b> | 3 | 0.78 | 0.01 |      |      |      |      |       |       |         |        | 1.16 | 0.22 | 4.12  |
| <b>T139</b> | 3 | 0.81 | 0.01 |      |      |      |      |       |       |         |        | 2.74 | 0.24 | 12.04 |
| <b>D140</b> | 4 | 0.80 | 0.01 |      |      |      |      | 38.65 | 7.80  |         |        | 0.96 | 0.19 | 7.45  |
| <b>Y141</b> | 4 | 0.73 | 0.02 |      |      |      |      | 16.71 | 5.41  |         |        | 0.91 | 0.25 | 8.34  |
| <b>D142</b> | 4 | 0.83 | 0.01 |      |      |      |      | 29.00 | 10.07 |         |        | 0.59 | 0.25 | 16.55 |
| <b>N143</b> | 4 | 0.66 | 0.01 |      |      |      |      | 23.41 | 3.09  |         |        | 0.45 | 0.09 | 27.65 |
| <b>I144</b> | 4 | 0.77 | 0.01 |      |      |      |      | 22.72 | 5.92  |         |        | 0.22 | 0.13 | 4.33  |
| <b>A146</b> | 3 | 0.94 | 0.03 |      |      |      |      |       |       |         |        | 0.68 | 0.26 | 17.60 |
| <b>C148</b> | 3 | 0.86 | 0.02 |      |      |      |      |       |       |         |        | 8.26 | 0.38 | 9.13  |
| <b>L149</b> | 3 | 0.89 | 0.01 |      |      |      |      |       |       |         |        | 2.86 | 0.23 | 0.89  |
| <b>N150</b> | 3 | 0.86 | 0.01 |      |      |      |      |       |       |         |        | 0.30 | 0.13 | 19.27 |
| <b>K151</b> | 3 | 0.83 | 0.01 |      |      |      |      |       |       |         |        | 1.34 | 0.17 | 21.67 |
| <b>F152</b> | 3 | 0.86 | 0.02 |      |      |      |      |       |       |         |        | 1.00 | 0.30 | 8.53  |
| <b>N153</b> | 1 | 0.88 | 0.01 |      |      |      |      |       |       |         |        |      |      | 12.30 |
| <b>E154</b> | 3 | 0.82 | 0.01 |      |      |      |      |       |       |         |        | 0.63 | 0.18 | 7.76  |
| <b>Y155</b> | 3 | 0.84 | 0.01 |      |      |      |      |       |       |         |        | 0.59 | 0.17 | 7.82  |
| <b>A156</b> | 3 | 0.85 | 0.01 |      |      |      |      |       |       |         |        | 0.32 | 0.11 | 14.82 |
| <b>V157</b> | 3 | 0.74 | 0.01 |      |      |      |      |       |       |         |        | 1.35 | 0.16 | 12.27 |
| <b>E160</b> | 2 | 0.77 | 0.02 |      |      |      |      | 25.81 | 12.10 |         |        |      |      | 6.44  |
| <b>T161</b> | 5 | 0.63 | 0.01 | 0.72 | 0.01 | 0.87 | 0.01 |       |       | 923.73  | 120.83 |      |      | 21.71 |
| <b>R162</b> | 3 | 0.85 | 0.02 |      |      |      |      |       |       |         |        | 0.99 | 0.29 | 12.08 |
| <b>D163</b> | 3 | 0.80 | 0.02 |      |      |      |      |       |       |         |        | 1.07 | 0.25 | 4.35  |
| <b>V164</b> | 3 | 0.80 | 0.01 |      |      |      |      |       |       |         |        | 0.60 | 0.29 | 0.76  |
| <b>F165</b> |   |      |      |      |      |      |      |       |       |         |        |      |      |       |
| <b>T166</b> | 3 | 0.79 | 0.01 |      |      |      |      |       |       |         |        | 0.60 | 0.28 | 5.09  |
| <b>S167</b> | 4 | 0.80 | 0.05 |      |      |      |      | 37.77 | 26.47 |         |        | 1.72 | 0.77 | 0.81  |
| <b>A168</b> | 3 | 0.92 | 0.03 |      |      |      |      |       |       |         |        | 0.62 | 0.39 | 16.22 |
| <b>C169</b> |   |      |      |      |      |      |      |       |       |         |        |      |      |       |
| <b>L170</b> | 2 | 0.77 | 0.01 |      |      |      |      | 31.71 | 5.81  |         |        |      |      | 6.04  |
| <b>E171</b> | 5 | 0.32 | 0.00 | 0.72 | 0.01 | 0.44 | 0.01 |       |       | 1426.07 | 30.09  |      |      | 107.6 |

**Table s8**  $T\Delta S_{conf}$  values for backbone amide groups between *apo* rRaHBP-2(D24R) and the histamine bound complex. Residues with an absolute  $T\Delta S_{conf}$  value greater than the error are shown in bold.

| <i>complex - apo</i> |                                               |              |
|----------------------|-----------------------------------------------|--------------|
| <b>Residue</b>       | <b><math>T\Delta S_{conf}</math> (kJ/mol)</b> | <b>error</b> |
| Asp 4                | -0.55                                         | 1.48         |
| Trp 5                | 0.42                                          | 0.62         |
| Ala 6                | -0.30                                         | 0.44         |
| Asp 7                | -0.01                                         | 0.30         |
| Glu 8                | <b>-0.91</b>                                  | <b>0.39</b>  |
| Ala 9                | <b>-0.44</b>                                  | <b>0.33</b>  |
| Ala 10               | -0.07                                         | 0.34         |
| Asn 11               | -0.56                                         | 0.67         |
| Gly 12               | 0.52                                          | 0.78         |
| Ala 13               | -0.27                                         | 4.43         |
| Gln 15               |                                               |              |
| Asp 16               | <b>0.40</b>                                   | <b>0.38</b>  |
| Ala 17               | <b>-0.68</b>                                  | <b>0.41</b>  |
| Trp 18               |                                               |              |
| Lys 19               | -0.02                                         | 0.41         |
| Ser 20               | 0.05                                          | 0.41         |
| Leu 21               | <b>1.00</b>                                   | <b>0.71</b>  |
| Lys 22               | 0.40                                          | 0.42         |
| Ala 23               | <b>0.92</b>                                   | <b>0.47</b>  |
| Arg 24               |                                               |              |
| Val 25               |                                               |              |
| Asn 27               | 0.19                                          | 0.30         |
| Tyr 29               | -0.34                                         | 0.46         |
| Tyr 30               | <b>1.03</b>                                   | <b>0.87</b>  |
| Val 32               | 0.28                                          | 0.82         |
| Lys 33               | -0.29                                         | 0.39         |
| Ala 34               | <b>0.73</b>                                   | <b>0.49</b>  |
| Thr 35               | 0.23                                          | 0.62         |
| Lys 37               | 0.85                                          | 1.17         |
| Asn 38               | <b>-1.61</b>                                  | <b>1.22</b>  |
| Asn 44               | 0.76                                          | 1.05         |
| Asp 45               | <b>0.73</b>                                   | <b>0.56</b>  |
| Phe 46               | 0.08                                          | 0.42         |

|               |              |             |
|---------------|--------------|-------------|
| <b>Thr 47</b> | -0.09        | 0.68        |
| <b>Val 49</b> | 0.41         | 0.50        |
| <b>Val 51</b> | 0.84         | 0.94        |
| <b>Met 52</b> | -0.21        | 0.62        |
| <b>Ala 53</b> | 0.22         | 1.51        |
| <b>Asn 54</b> | -0.02        | 0.42        |
| <b>Val 56</b> |              |             |
| <b>Asn 57</b> | 0.17         | 0.52        |
| <b>Glu 58</b> | <b>1.21</b>  | <b>0.90</b> |
| <b>Asp 59</b> | 0.24         | 0.22        |
| <b>Glu 60</b> | <b>0.28</b>  | <b>0.27</b> |
| <b>Lys 61</b> | 0.17         | 0.37        |
| <b>Ser 62</b> | -0.46        | 0.54        |
| <b>Ile 63</b> | -0.57        | 0.83        |
| <b>Gln 64</b> |              |             |
| <b>Ala 65</b> | -0.22        | 0.36        |
| <b>Glu 66</b> | 0.63         | 0.91        |
| <b>Phe 67</b> | 0.11         | 0.70        |
| <b>Leu 69</b> |              |             |
| <b>Met 70</b> | -0.03        | 0.66        |
| <b>Asn 71</b> |              |             |
| <b>Asn 72</b> | -0.07        | 0.64        |
| <b>Asp 74</b> | <b>0.83</b>  | <b>0.20</b> |
| <b>Thr 75</b> | <b>0.81</b>  | <b>0.75</b> |
| <b>Met 77</b> | 0.30         | 0.45        |
| <b>Gln 78</b> | 0.29         | 0.70        |
| <b>Ala 80</b> | 0.48         | 0.57        |
| <b>Thr 81</b> | <b>0.75</b>  | <b>0.38</b> |
| <b>Glu 82</b> | 0.28         | 0.73        |
| <b>Lys 83</b> | <b>-1.63</b> | <b>0.86</b> |
| <b>Val 84</b> | 0.47         | 1.50        |
| <b>Thr 85</b> |              |             |
| <b>Ala 86</b> | 0.02         | 0.71        |
| <b>Lys 88</b> | -0.75        | 0.78        |
| <b>Met 89</b> | <b>0.41</b>  | <b>0.29</b> |
| <b>Gly 91</b> | -0.03        | 2.19        |
| <b>Tyr 92</b> | -0.20        | 0.74        |
| <b>Asn 93</b> | 0.00         | 0.62        |
| <b>Arg 94</b> |              |             |
| <b>Glu 95</b> | <b>0.85</b>  | <b>0.39</b> |



|         |              |             |
|---------|--------------|-------------|
| Asn 96  | 0.52         | 0.67        |
| Ala 99  | <b>1.07</b>  | <b>0.40</b> |
| Glu 101 | 0.58         | 0.86        |
| Thr 102 | -0.22        | 0.67        |
| Glu 103 | -0.46        | 0.73        |
| Asp 104 |              |             |
| Gly 105 | -0.03        | 0.47        |
| Gln 106 | -0.46        | 0.56        |
| Val 107 | -0.30        | 0.34        |
| Val 111 | -0.04        | 0.58        |
| Ile 112 |              |             |
| Ala 113 | 0.01         | 0.61        |
| Ser 115 | 0.09         | 0.38        |
| Asp 116 | -0.10        | 0.48        |
| Asp 117 | -0.44        | 2.15        |
| Asn 118 | <b>-0.80</b> | <b>0.68</b> |
| Cys 119 | <b>1.19</b>  | <b>0.81</b> |
| Asp 120 | 0.43         | 2.79        |
| Val 121 | <b>0.55</b>  | <b>0.43</b> |
| Ile 122 | 0.08         | 0.53        |
| Tyr 123 | 0.19         | 0.72        |
| Val 124 | 0.91         | 0.96        |
| Gly 126 | 0.96         | 1.48        |
| Thr 127 | 0.49         | 0.93        |
| Gly 129 | 0.14         | 0.54        |
| Gly 133 | -0.52        | 0.94        |
| Tyr 134 | -0.34        | 0.54        |
| Glu 135 | 0.33         | 0.46        |
| Leu 136 | -0.13        | 0.47        |
| Trp 137 | 0.59         | 0.61        |
| Thr 138 | <b>1.25</b>  | <b>0.47</b> |
| Thr 139 | 0.02         | 0.60        |
| Asp 140 | 0.31         | 0.41        |
| Tyr 141 | 0.32         | 0.45        |
| Asp 142 | 0.16         | 0.48        |
| Asn 143 | <b>0.13</b>  | <b>0.12</b> |
| Ile 144 | <b>-0.38</b> | <b>0.32</b> |
| Ala 146 | -1.35        | 1.97        |
| Cys 148 | -0.38        | 0.82        |
| Leu 149 | -0.25        | 0.81        |

|                                  |              |             |
|----------------------------------|--------------|-------------|
| <b>Asn 150</b>                   | 0.19         | 0.40        |
| <b>Lys 151</b>                   | 0.60         | 0.60        |
| <b>Phe 152</b>                   | -0.28        | 0.71        |
| <b>Asn 153</b>                   | 0.19         | 0.50        |
| <b>Glu 154</b>                   | <b>0.44</b>  | <b>0.43</b> |
| <b>Ala 156</b>                   |              |             |
| <b>Val 157</b>                   | 0.19         | 0.24        |
| <b>Glu 160</b>                   | -0.20        | 0.45        |
| <b>Arg 162</b>                   | 0.72         | 0.86        |
| <b>Asp 163</b>                   | 0.14         | 0.60        |
| <b>Val 164</b>                   | <b>-0.59</b> | <b>0.44</b> |
| <b>Phe 165</b>                   |              |             |
| <b>Thr 166</b>                   | <b>-0.49</b> | <b>0.47</b> |
| <b>Ser 167</b>                   | 1.04         | 1.48        |
| <b>Ala 168</b>                   | -1.61        | 2.15        |
| <b>Leu 170</b>                   | 0.06         | 0.24        |
| <b>Glu 171</b>                   | <b>-0.15</b> | <b>0.05</b> |
| <hr/> <i>TΔS<sub>amide</sub></i> | <b>12.37</b> | <b>9.76</b> |
